# Supplementary material
Source: Research Square preprint supplement (doi:10.21203/rs.3.rs-9542276/v1)
Supplement: Supplementary file 1 [file 5bd9bcffc31c3b466a9c8408.pdf]

Supplementary Fig. 4A

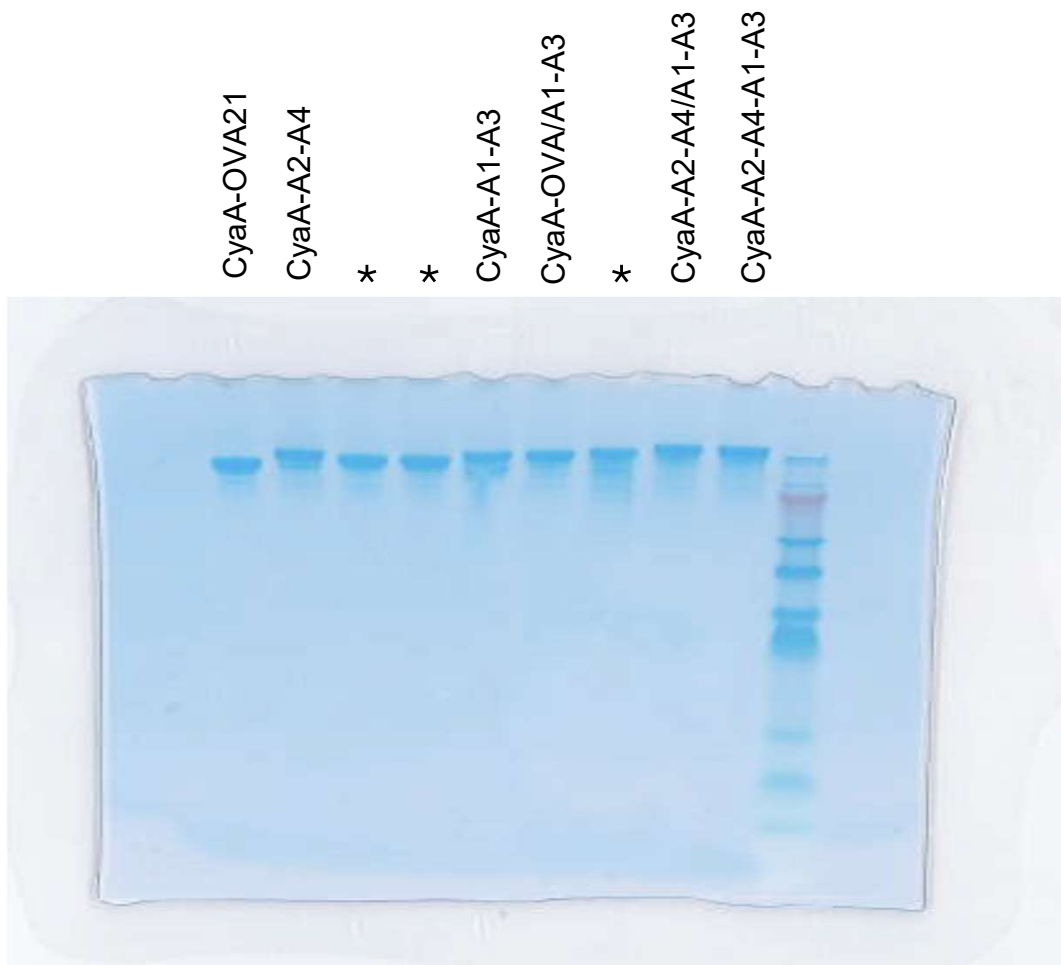

\*Samples not included in the final figure

Supplementary Fig. 4B

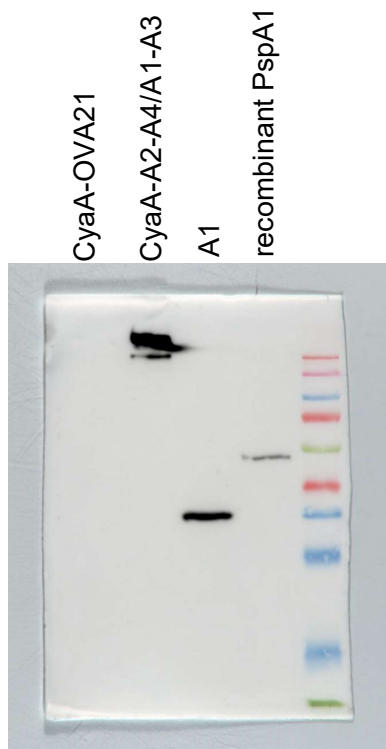

Anti-A1 sera

Supplementary Fig. 4C

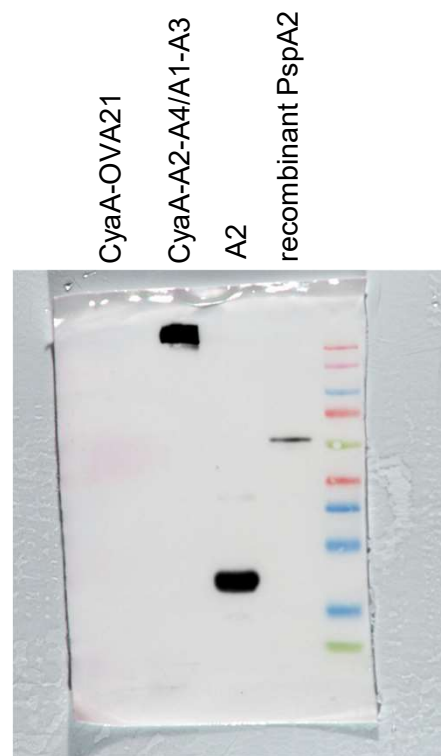

Anti-A2 sera

Supplementary Fig. 4D

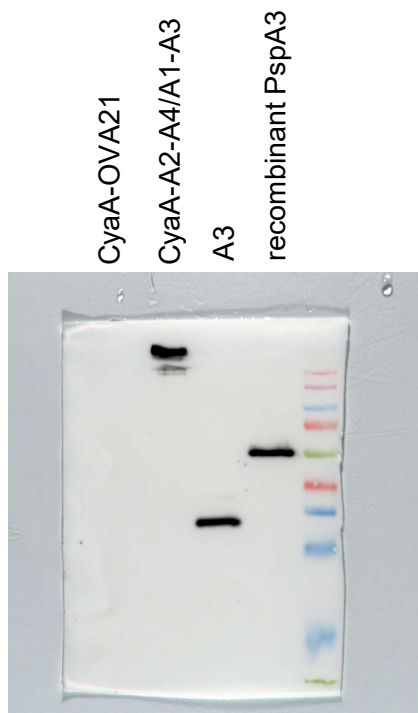

Anti-A3 sera

Supplementary Fig. 4E

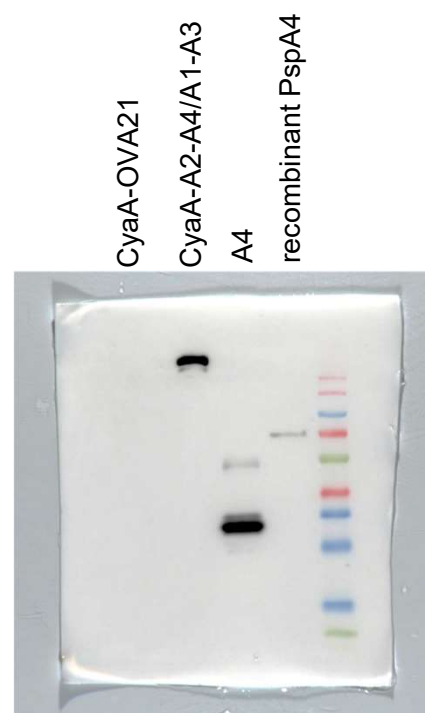

Anti-A4 sera
