# Supplementary material
Source: Research Square preprint supplement (doi:10.21203/rs.3.rs-9542276/v1)
Supplement: Supplementary file 1 [file b91ab9f63df817cd124fc88a.xlsx]

## Sheet: Fig. 1
	1A	anti-PspA2 IgG titer (sera)					anti-PspA4 IgG titer (sera)
		group: CyaA-OVA21		group: CyaA-A2-A4			group: CyaA-OVA21		group: CyaA-A2-A4
		animal	titer	animal	titer		animal	titer	animal	titer
		1	*	1	6400		1	*	1	12800
		2	*	2	12800		2	*	2	6400
		3	*	3	12800		3	*	3	12800
		4	*	4	12800		4	*	4	6400
		5	*	5	6400		5	*	5	3200
		6	*	6	400		6	*	6	12800
		7	*	7	12800		7	*	7	3200
		8	*	8	6400		8	*	8	3200
		9	*	9	6400		9	*	9	1600
		10	*	10	800		10	*	10	6400
		11	*	11	3200		11	*	11	1600
		12	*	12	12800		12	*	12	1600
		*No detectable titer (limit of detection: sera dilution at 1:20)					*No detectable titer (limit of detection: sera dilution at 1:20)
	1B	anti-PS3 IgG titer (sera)
		group: Alum		group: PCV13
		animal	titer	animal	titer
		1	*	1	800
		2	*	2	800
		3	*	3	400
		4	20	4	1600
		5	20	5	800
		6	40	6	1600
		7	*	7	800
		8	*	8	400
		9	*	9	400
		10	*	10	400
		11	*	11	1600
		12	*	12	400
		*No detectable titer (limit of detection: sera dilution at 1:20)
	1C	CFU count in lungs and BALF (12 hours post-challenge - 3JYP2670 strain)
		group: Alum			group: PCV13			group: CyaA-OVA21			group: CyaA-A2-A4
		animal	CFU - lungs	CFU - BALF	animal	CFU - lungs	CFU - BALF	animal	CFU - lungs	CFU - BALF	animal	CFU - lungs	CFU - BALF
		1	17820000	10350000	1	575100	1230000	1	5520000	800000	1	3600	50000
		2	170000	1920000	2	1820000	2025000	2	1914000	760000	2	4250	88000
		3	658000	3900000	3	1316000	420000	3	2268000	2600000	3	3040	12000
		4	960000	575000	4	190000	270000	4	2475000	2875000	4	101200	36000
		5	5700000	1600000	5	3290000	5250000	5	184000	120000	5	26700	87500
		6	13188000	3600000	6	900000	2200000	6	940000	1125000	6	4368	12000
	1D	anti-PspA4 IgG titer (BALF)
		group: CyaA-OVA21		group: CyaA-A2-A4
		animal	titer	animal	titer
		1	4	1	256	group: PCV13
		2	*	2	128
		3	*	3	128
		4	*	4	128
		5	*	5	64
		6	*	6	256
		*No detectable titer (limit of detection: BALF dilution at 1:4)
	1E	anti-PS3 IgG titer (BALF)
		group: Alum		group: PCV13
		animal	titer	animal	titer
		1	*	1	*
		2	*	2	*
		3	*	3	*
		4	4	4	*
		5	*	5	*
		6	*	6	*
		*No detectable titer (limit of detection: BALF dilution at 1:4)
	1F			Interstitial macrophages, alveolar macrophages and neutrophils in BALF
				% in single cells			total of cells in BALF
				Cells/Single Cells/ F4_80+/Q1: CD11c- , CD11b+	Cells/Single Cells/ F4_80+/Q3: CD11c+ , CD11b-	Cells/Single Cells/ F4_80-/Q2: Ly6G+ , CD11b+
				% interstitial macrophages	% alveolar macrophages	% neutrophils	interstitial macrophages	alveolar macrophages	neutrophils
		group: Alum	animal 1	0.0438	0.18	0.321	4620	27060	141240
			animal 2	0.0149	0.16	0.431	1188	23814	277560
			animal 3	0.0304	0.347	0.569	2360	71390	422380
			animal 4	0.0118	0.126	0.58	800	18720	438400
			animal 5	0.0162	0.134	0.514	1440	21960	290000
			animal 6	0.0272	0.176	0.548	2312	25636	386920
		group: PCV13	animal 1	0.0266	0.192	0.573	1758	41514	336800
			animal 2	0.0359	0.113	0.421	1860	22072	218400
			animal 3	0.0224	0.0799	0.42	1012	15180	224020
			animal 4	0.024	0.156	0.478	1620	32292	258120
			animal 5	0.14	0.177	0.574	4154	39680	355880
			animal 6	0.0506	0.134	0.487	2668	23920	263580
		group: CyaA-OVA21	animal 1	0.0335	0.0692	0.444	2444	11388	229240
			animal 2	0.018	0.0978	0.417	760	13040	225160
			animal 3	0.0195	0.109	0.521	1254	28612	275280
			animal 4	0.0659	0.201	0.557	3200	33760	356480
			animal 5	0.0581	0.0759	0.55	3040	12480	330000
			animal 6	0.0246	0.0272	0.433	1368	10336	225180
		group: CyaA-A2-A4	animal 1	0.0156	0.161	0.367	836	23188	172640
			animal 2	0.0174	0.159	0.333	1080	22842	135600
			animal 3	0.0406	0.201	0.421	4928	31372	206460
			animal 4	0.0358	0.166	0.404	2368	24576	176820
			animal 5	0.0158	0.169	0.332	1020	27120	80800
			animal 6	0.0136	0.096	0.339	352	7634	139460
	1G			TNF-α (BALF)	IL-6 (BALF)
				pg/mL	pg/mL
		group: Alum	animal 1	871	827
			animal 2	1581	793.667
			animal 3	1681	1453.67
			animal 4	1131	1003.67
			animal 5	1331	947
			animal 6	1321	763.667
		group: PCV13	animal 1	1311	657
			animal 2	1021	1157
			animal 3	751	793.667
			animal 4	911	450.333
			animal 5	991	607
			animal 6	1201	593.667
		group: CyaA-OVA21	animal 1	1051	707
			animal 2	901	713.667
			animal 3	1141	1537
			animal 4	1381	1453.67
			animal 5	1301	953.667
			animal 6	911	1120.33
		group: CyaA-A2-A4	animal 1	551	323.667
			animal 2	461	353.667
			animal 3	311	160.333
			animal 4	721	307
			animal 5	871	550.333
			animal 6	581	400.333
	1H	Survival after invasive challenge - 3JYP2670 strain
		Days after challenge	groups
			Alum	PCV13	CyaA-OVA21	CyaA-A2-A4
		3	1		1
		3	1		1
		3	1		1
		3	1		1
		3	1		1
		3	1		1
		10		0		0
		10		0		0
		10		0		0
		10		0		0
		10		0		0
		10		0		0
		outcomes: (1) death; (0) survival;

## Sheet: Fig. 2
	2A	anti-PspA1 IgG titer (sera)
		group: CyaA-OVA21		group: CyaA-A2-A4		group: CyaA-A2-A4/A1-A3
		animal	titer	animal	titer	animal	titer
		1	20	1	80	1	8000
		2	*	2	20	2	8000
		3	*	3	20	3	2000
		4	*	4	20	4	16000
		5	*	5	40	5	2000
		6	*	-		6	4000
		*No detectable titer (limit of detection: sera dilution at 1:20)
	2B	anti-PspA2 IgG titer (sera)
		group: CyaA-OVA21		group: CyaA-A2-A4		group: CyaA-A2-A4/A1-A3
		animal	titer	animal	titer	animal	titer
		1	*	1	3200	1	12800
		2	40	2	6400	2	6400
		3	20	3	6400	3	25600
		4	20	4	12800	4	6400
		5	*	5	25600	5	6400
		6	*	-		6	25600
		*No detectable titer (lowest sera dilution = 1:20)
	2C	anti-PspA3 IgG titer (sera)
		group: CyaA-OVA21		group: CyaA-A2-A4		group: CyaA-A2-A4/A1-A3
		animal	titer	animal	titer	animal	titer
		1	*	1	1280	1	8000
		2	*	2	640	2	8000
		3	*	3	80	3	16000
		4	*	4	2560	4	8000
		5	*	5	320	5	32000
		6	*	-		6	16000
		*No detectable titer (limit of detection: sera dilution at 1:20)
	2D	anti-PspA4 IgG titer (sera)
		group: CyaA-OVA21		group: CyaA-A2-A4		group: CyaA-A2-A4/A1-A3
		animal	titer	animal	titer	animal	titer
		1	*	1	1600	1	3200
		2	*	2	3200	2	1600
		3	*	3	6400	3	6400
		4	*	4	6400	4	6400
		5	*	5	6400	5	3200
		6	*	-		6	12800
		*No detectable titer (limit of detection: sera dilution at 1:20)
	2E	anti-A IgG titer (sera)
		group: CyaA-OVA21		group: CyaA-A2-A4		group: CyaA-A2-A4/A1-A3
		animal	titer	animal	titer	animal	titer
		1	*	1	6400	1	64000
		2	*	2	6400	2	64000
		3	*	3	12800	3	128000
		4	*	4	12800	4	64000
		5	*	5	25600	5	128000
		6	*	-		6	128000
		*No detectable titer (limit of detection: sera dilution at 1:20)
	2F	anti-A IgG1/IgG2a titer (sera)
		group: CyaA-A2-A4			group: CyaA-A2-A4/A1-A3
		animal	IgG1 titer	IgG2a titer	animal	IgG1 titer	IgG2a titer
		1	12800	3200	1	64000	12800
		2	12800	3200	2	128000	25600
		3	6400	1600	3	128000	51200
		4	6400	800	4	128000	12800
		5	12800	1600	5	128000	51200
		-			6	128000	25600

## Sheet: Fig. 3
		anti-mouse IgG-FITC median fluorescence intensity
	3A	EF3030 strain
		Sample:	Bacteria | Median (FITC-A)
		Negative control (no sera)	274
		CyaA-OVA21 (pooled sera)	384
		CyaA-A2-A4 (pooled sera)	388
		CyaA-A2-A4/A1-A3 (pooled sera)	4009
	3B	ATCC6301 strain
		Sample:	Bacteria | Median (FITC-A)
		Negative control (no sera)	112
		CyaA-OVA21 (pooled sera)	115
		CyaA-A2-A4 (pooled sera)	134
		CyaA-A2-A4/A1-A3 (pooled sera)	4807
	3C	0603 strain
		Sample:	Bacteria | Median (FITC-A)
		Negative control (no sera)	99.9
		CyaA-OVA21 (pooled sera)	104
		CyaA-A2-A4 (pooled sera)	111
		CyaA-A2-A4/A1-A3 (pooled sera)	2305
	3D	D39 strain
		Sample:	Bacteria | Median (FITC-A)
		Negative control (no sera)	165
		CyaA-OVA21 (pooled sera)	161
		CyaA-A2-A4 (pooled sera)	1627
		CyaA-A2-A4/A1-A3 (pooled sera)	1797
	3E	A66.1 strain
		Sample:	Bacteria | Median (FITC-A)
		Negative control (no sera)	68.1
		CyaA-OVA21 (pooled sera)	114
		CyaA-A2-A4 (pooled sera)	6212
		CyaA-A2-A4/A1-A3 (pooled sera)	5458
	3F	M10 strain
		Sample:	Bacteria | Median (FITC-A)
		Negative control (no sera)	173
		CyaA-OVA21 (pooled sera)	184
		CyaA-A2-A4 (pooled sera)	1471
		CyaA-A2-A4/A1-A3 (pooled sera)	6089
	3G	TIGR4 strain
		Sample:	Bacteria | Median (FITC-A)
		Negative control (no sera)	229
		CyaA-OVA21 (pooled sera)	348
		CyaA-A2-A4 (pooled sera)	3492
		CyaA-A2-A4/A1-A3 (pooled sera)	13482
	3H	HU473/06 strain
		Sample:	Bacteria | Median (FITC-A)
		Negative control (no sera)	168
		CyaA-OVA21 (pooled sera)	241
		CyaA-A2-A4 (pooled sera)	201
		CyaA-A2-A4/A1-A3 (pooled sera)	2006
	3I	3JYP2670 strain
		Sample:	Bacteria | Median (FITC-A)
		Negative control (no sera)	115
		CyaA-OVA21 (pooled sera)	164
		CyaA-A2-A4 (pooled sera)	8906
		CyaA-A2-A4/A1-A3 (pooled sera)	5849
	3J	255/00 strain
		Sample:	Bacteria | Median (FITC-A)
		Negative control (no sera)	74.1
		CyaA-OVA21 (pooled sera)	141
		CyaA-A2-A4 (pooled sera)	12064
		CyaA-A2-A4/A1-A3 (pooled sera)	10343
	3K	122/02 strain
		Sample:	Bacteria | Median (FITC-A)
		Negative control (no sera)	99.9
		CyaA-OVA21 (pooled sera)	104
		CyaA-A2-A4 (pooled sera)	2776
		CyaA-A2-A4/A1-A3 (pooled sera)	3207
	3L	ATCC6303 strain
		Sample:	Bacteria | Median (FITC-A)
		Negative control (no sera)	120
		CyaA-OVA21 (pooled sera)	158
		CyaA-A2-A4 (pooled sera)	9314
		CyaA-A2-A4/A1-A3 (pooled sera)	5891

## Sheet: Fig. 4
	4A	CFU count in lungs and BALF (24 hours post-challenge - EF3030 strain)							CFU count in lungs and BALF (24 hours post-challenge - EF3030 strain)
		group: CyaA-OVA21			group: CyaA-A2-A4/A1-A3				group: CyaA-OVA21			group: CyaA-A2-A4/A1-A3
		animal	CFU - lungs	CFU - BALF	animal	CFU - lungs	CFU - BALF		animal	CFU - lungs	CFU - BALF	animal	CFU - lungs	CFU - BALF
		1	31110	64190	1	900	15875		1	1274	2700	1	96.5	10520
		2	39780	112560	2	6965	34650		2	9600	101600	2	101.5	6250
		3	15680	3648	3	96.5	6650		3	5980	6400	3	102.5	13530
		4	7760	25740	4	1560	37950		4	4900	17420	4	689.5	7860
		5	2925	20020	5	1144	61200		5	672	8680	5	714	67000
	4B	anti-PspA1 IgG titer (BALF)							anti-PspA1 IgG titer (BALF)
		group: CyaA-OVA21		group: CyaA-A2-A4/A1-A3					group: CyaA-OVA21		group: CyaA-A2-A4/A1-A3
		animal	titer	animal	titer				animal	titer	animal	titer
		1	*	1	160				1	*	1	320
		2	*	2	320				2	*	2	40
		3	*	3	80				3	*	3	320
		4	*	4	20				4	*	4	20
		5	*	5	80				5	*	5	80
		*No detectable titer (limit of detection: BALF dilution at 1:4)							*No detectable titer (limit of detection: BALF dilution at 1:4)
	4C	CFU count in lungs and BALF (24 hours post-challenge - TIGR4 strain)
		group: CyaA-OVA21			group: CyaA-A2-A4/A1-A3
		animal	CFU - lungs	CFU - BALF	animal	CFU - lungs	CFU - BALF
		1	145120	6800	1	8075	452
		2	54450	7200	2	9600	125
		3	159680	6075	3	4557	110
		4	108020	5967	4	7960	1722
		5	78400	13530	5	6475	1270
		6	128125	9100	6	5502	1512
	4D	anti-PspA3 IgG titer (BALF)
		group: CyaA-OVA21		group: CyaA-A2-A4/A1-A3
		animal	titer	animal	titer
		1	*	1	320
		2	*	2	80
		3	*	3	160
		4	*	4	80
		5	*	5	320
		6	*	5	320
		*No detectable titer (limit of detection: BALF dilution at 1:4)
	4E	CFU count in lungs and BALF - 12 hours or 24 hours post-challenge - ATCC6303 strain
		group: CyaA-OVA21						group: CyaA-A2-A4/A1-A3
		12 h post-challenge			24 h post-challenge			12 h post-challenge			24 h post-challenge
		animal	CFU - lungs	CFU - BALF	animal	CFU - lungs	CFU - BALF	animal	CFU - lungs	CFU - BALF	animal	CFU - lungs	CFU - BALF
		1	12837500	2794500	1	2880000	2099500	1	305760	1080000	1	184000	179200
		2	13845000	5535000	2	22770000	3000000	2	244250	759000	2	550050	126500
		3	3674600	11481000	3	73500000	9450000	3	218250	455400	3	137200	356400
		4	3165100	8364000	4	1061500	3415500	4	522500	738000	4	50490	156600
		5	6114000	5900000	5	8800000	4960000	5	436000	635000	5	57000	144100
	4F	anti-PspA5 IgG titer (BALF)
		group: CyaA-OVA21						group: CyaA-A2-A4/A1-A3
		0 h		12 h post-challenge		24 h post-challenge		0 h		12 h post-challenge		24 h post-challenge
		animal	titer	animal	titer	animal	titer	animal	titer	animal	titer	animal	titer
		1	*	1	*	1	*	1	16	1	256	1	320
		2	*	2	*	2	*	2	16	2	128	2	256
		3	*	3	*	3	*	3	8	3	160	3	256
		4	*	4	*	4	*	4	128	4	128	4	160
		5	*	5	*	5	*	5	16	5	256	5	256
		*No detectable titer (limit of detection: BALF dilution at 1:4)
	4G	Survival after invasive challenge - ATCC6303 strain
		Days after challenge	groups
			CyaA-OVA21		CyaA-A2-A4-A1-A3
		3	1
		3	1
		3	1
		3	1
		3	1
		4	1
		10			0
		10			0
		10			0
		10			0
		10			0
		10			0
		outcomes: (1) death; (0) survival;

## Sheet: Fig. 5
	5A	anti-mouse IgG-FITC median fluorescence intensity
		LIV012-S3 strain
		Sample:	Bacteria | Median (FITC-A)
		Negative control (no sera)	108
		CyaA-OVA21 (pooled sera)	126
		CyaA-A2-A4/A1-A3 (pooled sera)	4342
		LIV006-S3 strain
		Sample:	Bacteria | Median (FITC-A)
		Negative control (no sera)	86.4
		CyaA-OVA21 (pooled sera)	116
		CyaA-A2-A4/A1-A3 (pooled sera)	11728
		LIV004-S3
		Sample:	Bacteria | Median (FITC-A)
		Negative control (no sera)	108
		CyaA-OVA21 (pooled sera)	95
		CyaA-A2-A4/A1-A3 (pooled sera)	7927
		LIV008-S3 strain
		Sample:	Bacteria | Median (FITC-A)
		Negative control (no sera)	44.7
		CyaA-OVA21 (pooled sera)	59
		CyaA-A2-A4/A1-A3 (pooled sera)	8328
		LIV011-S3
		Sample:	Bacteria | Median (FITC-A)
		Negative control (no sera)	84.1
		CyaA-OVA21 (pooled sera)	92
		CyaA-A2-A4/A1-A3 (pooled sera)	5425
		LIV009-S3
		Sample:	Bacteria | Median (FITC-A)
		Negative control (no sera)	96.6
		CyaA-OVA21 (pooled sera)	4328
		CyaA-A2-A4/A1-A3 (pooled sera)	97
	5B	Survival after invasive challenge - LIV012-S3 strain
		Days after challenge	groups
			CyaA-OVA21	CyaA-A2-A4-A1-A3
		3	1
		3	1
		3	1
		4	1
		10	0	0
		10		0
		10		0
		10		0
		10		0
		10		0
		outcomes: (1) death; (0) survival;
	5C	Survival after invasive challenge - LIV006-S3 strain
		Days after challenge	groups
			CyaA-OVA21	CyaA-A2-A4-A1-A3
		2	1
		2	1
		3	1
		3	1	1
		4	1
		6	1
		10		0
		10		0
		10		0
		10		0
		10		0
		outcomes: (1) death; (0) survival;

## Sheet: Fig. 6
	6A	anti-PspA1 IgG titer (sera)
		group: CyaA-OVA21 + AddaS03		group: CyaA-A2-A4/A1-A3		group: CyaA-A2-A4/A1-A3 + AddaS03
		animal	titer	animal	titer	animal	titer
		1	*	1	*	1	640
		2	*	2	*	2	320
		3	*	3	*	3	160
		4	*	4	20	4	160
		5	*	5	*	5	160
		6	*	6	*	6	640
		*No detectable titer (limit of detection: sera dilution at 1:20)
	6B	anti-PspA2 IgG titer (sera)
		group: CyaA-OVA21 + AddaS03		group: CyaA-A2-A4/A1-A3		group: CyaA-A2-A4/A1-A3 + AddaS03
		animal	titer	animal	titer	animal	titer
		1	*	1	*	1	2560
		2	*	2	*	2	1280
		3	40	3	20	3	2560
		4	*	4	*	4	640
		5	*	5	40	5	2560
		6	*	6	*	6	1280
		*No detectable titer (limit of detection: sera dilution at 1:20)
	6C	anti-PspA3 IgG titer (sera)
		group: CyaA-OVA21 + AddaS03		group: CyaA-A2-A4/A1-A3		group: CyaA-A2-A4/A1-A3 + AddaS03
		animal	titer	animal	titer	animal	titer
		1	*	1	320	1	640
		2	*	2	20	2	2560
		3	*	3	*	3	640
		4	*	4	40	4	2560
		5	*	5	*	5	640
		6	*	6	*	6	640
		*No detectable titer (limit of detection: sera dilution at 1:20)
	6D	anti-PspA4 IgG titer (sera)
		group: CyaA-OVA21 + AddaS03		group: CyaA-A2-A4/A1-A3		group: CyaA-A2-A4/A1-A3 + AddaS03
		animal	titer	animal	titer	animal	titer
		1	*	1	*	1	640
		2	*	2	20	2	1280
		3	*	3	20	3	320
		4	*	4	*	4	640
		5	*	5	*	5	640
		6	*	6	20	6	640
		*No detectable titer (limit of detection: sera dilution at 1:20)
	6E	anti-A IgG titer (sera)
		group: CyaA-OVA21 + AddaS03		group: CyaA-A2-A4/A1-A3		group: CyaA-A2-A4/A1-A3 + AddaS03
		animal	titer	animal	titer	animal	titer
		1	*	1	20	1	1280
		2	*	2	*	2	640
		3	*	3	40	3	640
		4	*	4	40	4	2560
		5	*	5	20	5	640
		6	*	6	40	6	2560
		*No detectable titer (limit of detection: sera dilution at 1:20)
	6F	anti-A IgG1/IgG2a titer (sera)
		group: CyaA-A2-A4/A1-A3			group: CyaA-A2-A4/A1-A3 + AddaS03
		animal	IgG1 titer	IgG2a titer	animal	IgG1 titer	IgG2a titer
		1	*	*	1	6400	1600
		2	80	*	2	6400	1600
		3	160	40	3	3200	200
		4	*	20	4	6400	1600
		5	20	*	5	3200	400
		6	*	*	6	3200	1600
		*No detectable titer (limit of detection: sera dilution at 1:20)
	6G	Survival after invasive challenge - 3JYP2670 strain
		Days after challenge	groups
			CyaA-OVA21 + AddaS03	CyaA-A2-A4-A1-A3	CyaA-A2-A4-A1-A3 + AddaS03
		3	1	1
		3	1	1
		3	1	1
		3	1	1
		3	1
		10	0	0	0
		10		0	0
		10			0
		10			0
		10			0
		10			0
		outcomes: (1) death; (0) survival;

## Sheet: Fig. 7
	7A	anti-A IgG titer (sera) - 1 to 6 months post immunization
				months post immunization (mpi)									months post immunization (mpi)
				1 mpi	2 mpi	3 mpi	4 mpi	5 mpi	6 mpi				1 mpi	2 mpi	3 mpi	4 mpi	5 mpi	6 mpi
		1 dose: CyaA-OVA21 + AddaS03	animal	titer	titer	titer	titer	titer	titer		2 doses: CyaA-OVA21 + AddaS03	animal	titer	titer	titer	titer	titer	titer
			1	*	*	*	*	*	*			1	*	*	*	*	*	40
			2	*	*	*	*	*	*			2	*	*	*	*	*	40
			3	*	*	*	*	*	*			3	*	*	*	*	*	*
			4	*	*	*	*	*	*			4	*	20	20	*	*	*
			5	*	*	*	*	*	*			5	*	*	*	*	*	*
			6	*	*	*	*	*	*			6	*	*	*	*	*	*
				*No detectable titer (limit of detection: sera dilution at 1:20)									*No detectable titer (limit of detection: sera dilution at 1:20)
				months post immunization (mpi)									months post immunization (mpi)
				1 mpi	2 mpi	3 mpi	4 mpi	5 mpi	6 mpi				1 mpi	2 mpi	3 mpi	4 mpi	5 mpi	6 mpi
		1 dose: CyaA-A2-A4/A1-A3 + AddaS03	animal	titer	titer	titer	titer	titer	titer		2 doses: CyaA-A2-A4/A1-A3 + AddaS03	animal	titer	titer	titer	titer	titer	titer
			1	5120	10240	10240	20480	10240	1020			1	51200	25600	12800	102400	51200	12800
			2	10240	10240	10240	10240	5120	5120			2	102400	102400	51200	51200	102400	102400
			3	2560	5120	5120	10240	5120	10240			3	51200	25600	12800	102400	51200	51200
			4	5120	10240	10240	20480	10240	10240			4	102400	102400	51200	102400	51200	51200
			5	5120	5120	5120	5120	5120	5120			5	51200	25600	12800	25600	25600	12800
			6	5120	10240	5120	10240	10240	10240			6	51200	102400	51200	51200	51200	51200
	7B	Survival after invasive challenge - 3JYP2670 strain
		Days after challenge	groups
			1 dose: CyaA-OVA21 + AddaS03		1 dose: CyaA-A2-A4/A1-A3 + AddaS03		2 doses: CyaA-OVA21 + AddaS03		2 doses: CyaA-A2-A4/A1-A3 + AddaS03
		2	1		1		1
		2	1		1		1
		2	1				1
		2	1
		3	1		1		1
		3	1		1
		3			1
		4					1		1
		6			1		1		1
		10							0
		10							0
		10							0
		10							0
		outcomes: (1) death; (0) survival;
	7C	CFU count in lungs of surviving animals
		group	animal		CFU - lungs
		2 doses: CyaA-A2-A4/A1-A3 + AddaS03	1		176
			2		*
			3		*
			6		*
		*No detectable CFU (limit of detection ≥ 10 CFU)

## Sheet: Fig. S1
	S1 -A	anti-PS3 IgA (BALF)
		absorbance - BALF dilution at 1:2
		group: Alum		group: PCV13
		animal 1	0.028	animal 1	0.004
		animal 2	0.012	animal 2	0.011
		animal 3	0.008	animal 3	0.009
		animal 4	0.008	animal 4	0.009
		animal 5	0.01	animal 5	0.016
		animal 6	0.002	animal 6	0.009
	S1 -B	anti-PspA4 IgA (BALF)
		absorbance - BALF dilution at 1:2
		group: CyaA-OVA21		group: CyaA-A2-A4
		animal 1	0.009	animal 1	0.045
		animal 2	0.006	animal 2	0.02
		animal 3	0.003	animal 3	0.03
		animal 4	0.01	animal 4	0.011
		animal 5	0.004	animal 5	0.026
		animal 6	0.02	animal 6	0.08

## Sheet: Fig. S5
	S5- A	anti-PspA1 IgG titer (sera)
		group: CyaA-OVA21		group: CyaA-A1-A3		group: CyaA-OVA/A1-A3		group: CyaA-A2-A4/A1-A3		group: CyaA-A2-A4-A1-A3		group: CyaA-A2-A4 + CyaA-A1-A3
		animal	titer	animal	titer	animal	titer	animal	titer	animal	titer	animal	titer
		1	20	1	100	1	1600	1	12800	1	6400	1	800
		2	*	2	1600	2	3200	2	6400	2	3200	2	1600
		3	*	3	3200	3	1600	3	6400	3	6400	3	400
		4	*	4	200	4	3200	4	3200	4	6400	4	6400
		5	*	5	400	5	200	5	3200	5	3200	5	100
		*No detectable titer (limit of detection: sera dilution at 1:20)
	S5- B	anti-PspA2 IgG titer (sera)
		group: CyaA-OVA21		group: CyaA-A2-A4/A1-A3		group: CyaA-A2-A4-A1-A3		group: CyaA-A2-A4 + CyaA-A1-A3
		animal	titer	animal	titer	animal	titer	animal	titer
		1	*	1	12800	1	12800	1	1600
		2	*	2	3200	2	3200	2	3200
		3	20	3	12800	3	12800	3	3200
		4	*	4	6400	4	6400	4	3200
		5	20	5	6400	5	3200	5	800
		*No detectable titer (limit of detection: sera dilution at 1:20)
	S5- C	anti-PspA3 IgG titer (sera)
		group: CyaA-OVA21		group: CyaA-A1-A3		group: CyaA-OVA/A1-A3		group: CyaA-A2-A4/A1-A3		group: CyaA-A2-A4-A1-A3		group: CyaA-A2-A4 + CyaA-A1-A3
		animal	titer	animal	titer	animal	titer	animal	titer	animal	titer	animal	titer
		1	*	1	12800	1	3200	1	12800	1	12800	1	1600
		2	*	2	12800	2	6400	2	12800	2	12800	2	6400
		3	*	3	12800	3	3200	3	51200	3	25600	3	12800
		4	*	4	12800	4	25600	4	25600	4	3200	4	12800
		5	*	5	25600	5	6400	5	6400	5	6400	5	1600
		*No detectable titer (limit of detection: sera dilution at 1:20)
	S5- D	anti-PspA4 IgG titer (sera)
		group: CyaA-OVA21		group: CyaA-A2-A4/A1-A3		group: CyaA-A2-A4-A1-A3		group: CyaA-A2-A4 + CyaA-A1-A3
		animal	titer	animal	titer	animal	titer	animal	titer
		1	*	1	12800	1	12800	1	6400
		2	*	2	6400	2	3200	2	1600
		3	20	3	12800	3	6400	3	800
		4	*	4	12800	4	1600	4	12800
		5	*	5	3200	5	800	5	800
		*No detectable titer (limit of detection: sera dilution at 1:20)

## Sheet: Fig. S6
	S6- A	anti-CyaA-OVA21 IgG titer (sera)
		group: CyaA-OVA21			group: CyaA-A2-A4/A1-A3
		animal	2 doses	3 doses	animal	2 doses	3 doses
			titer	titer		titer	titer
		1	400	800	1	3200	6400
		2	800	3200	2	3200	6400
		3	3200	12800	3	1600	6400
		4	1600	3200	4	6400	12800
		5	1600	3200	5	1600	6400
	S6- B	anti-A IgG titer (sera)
		group: CyaA-OVA21			group: CyaA-A2-A4/A1-A3
		animal	2 doses	3 doses	animal	2 doses	3 doses
			titer	titer		titer	titer
		1	*	*	1	12800	64000
		2	20	40	2	12800	32000
		3	*	*	3	12800	64000
		4	*	*	4	3200	16000
		5	*	*	5	3200	16000

[truncated: 10 more sheets: Fig. S7, Fig. S8, Fig. S9, Fig. S10, Fig. S11, Fig. S12, Fig. S13, Fig. S14, Fig. S15, Fig. S16]
