# Supplementary material
Source: Research Square preprint supplement (doi:10.21203/rs.3.rs-9542276/v1)
Supplement: Supplementary file 2 [file d4a846ecef1c4b85fb398b33.pdf]

## SUPPLEMENTARY FIGURES

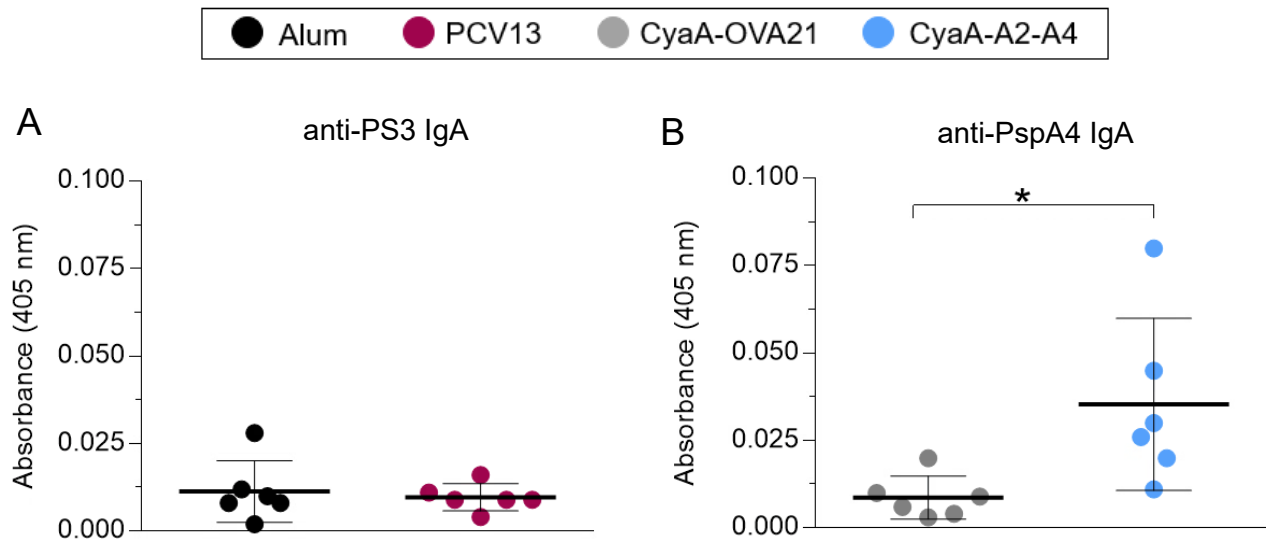

### Supplementary Fig. 1. Immunization with CyaA-A2-A4 induces minimal levels of anti-PspA IgA in the LRT of mice.

Mice (n = 6 per group) were immunized with three s.c. doses of Alum, PCV13, CyaA-OVA21 or CyaA-A2-A4. Three weeks after the third dose, animals were intranasally challenged with the pneumococcal strain 3JYP2670 (serotype 3, PspA4). BALF samples, collected 12 h post-challenge, were analyzed by ELISA for (A) anti-PS3 or (B) anti-PspA4 IgA levels and the absorbance values at 1:2 dilutions are shown. Student's T teste was used to analyze results among groups: \*P<0.05. Circles represent individual data; lines represent the mean for each group ± SEM.

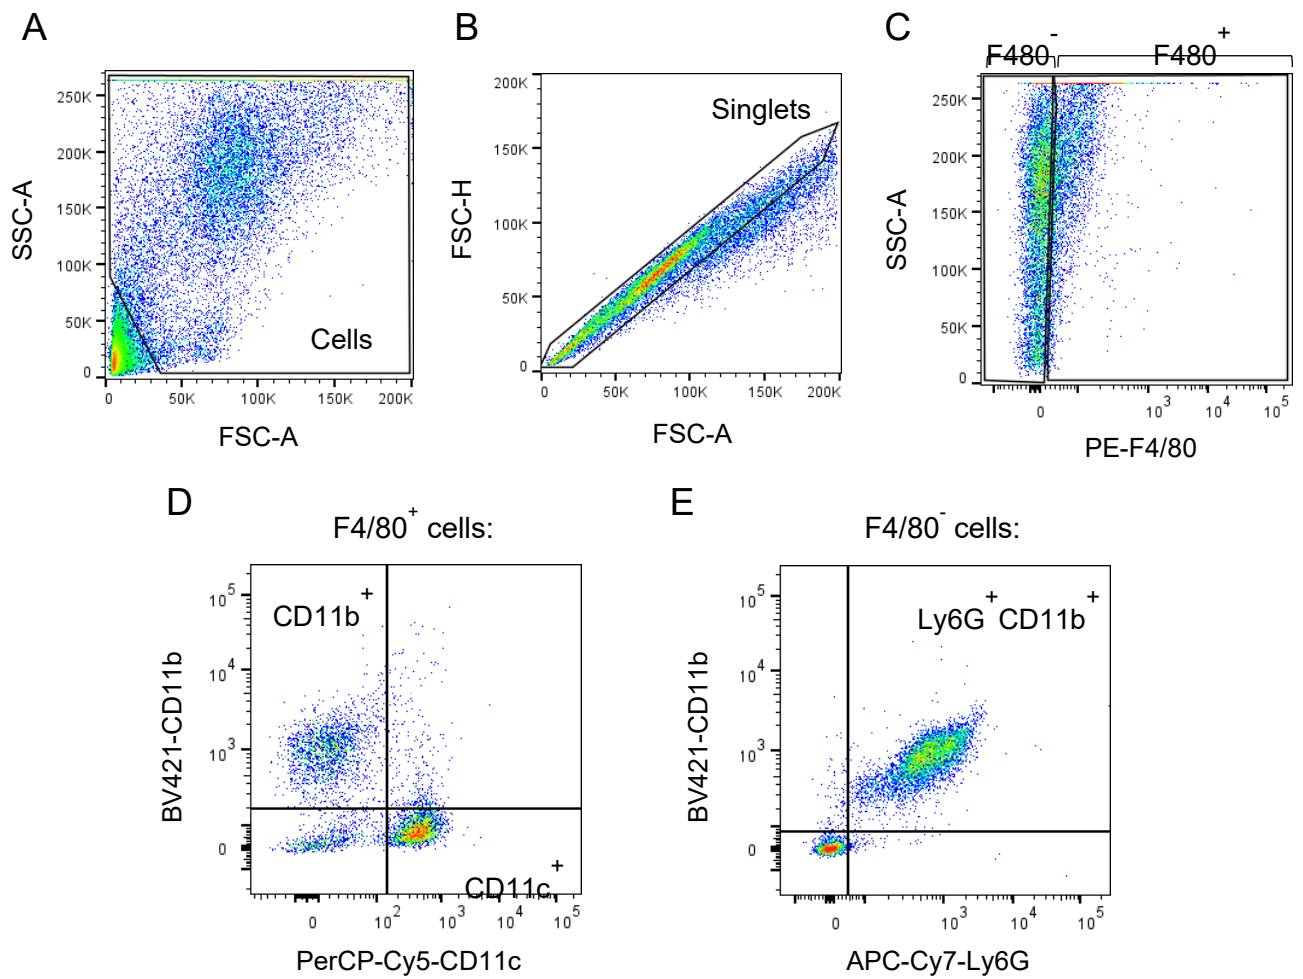

**Supplementary Fig. 2. Flow cytometry gating strategy to analyze populations of macrophages and neutrophils in the bronchoalveolar lavage fluid.**

Cells from BALF samples were stained with anti-mouse F4/80-PE, anti-mouse CD11c-PerCP-Cy5.5, anti-CD11b- BV421 and anti-Ly6G-APC-Cy7 antibodies and analyzed by flow cytometry. 20,000 events acquired in the cell gate (**A**) were analyzed using the FlowJo v10 software (Tree Star). (**A**) Cells were gated based on forward (FSC) and side (SSC) scatter excluding events with low size and granularity. (**B**) The cell population was evaluated using FSC-A and FSC-H parameters to discriminate singlets from aggregates. (**C**) Singlets were evaluated for PE fluorescence to define F4/80<sup>-</sup> and F4/80<sup>+</sup> populations. (**D**) F4/80<sup>+</sup> cells were analyzed for PerCP-Cy5 and APC-Cy7 fluorescence to identify F4/80<sup>+</sup>CD11b<sup>+</sup>CD11c<sup>-</sup> interstitial macrophages and F4/80<sup>+</sup>CD11b<sup>-</sup>CD11c<sup>+</sup> alveolar macrophages. (**e**) F4/80<sup>-</sup> cells were analyzed for BV421 and APC-Cy7 fluorescence to identify F4/80<sup>-</sup>CD11b<sup>+</sup>Ly6G<sup>+</sup> neutrophils. Fluorescence gates were set according to Fluorescence-minus-one controls.

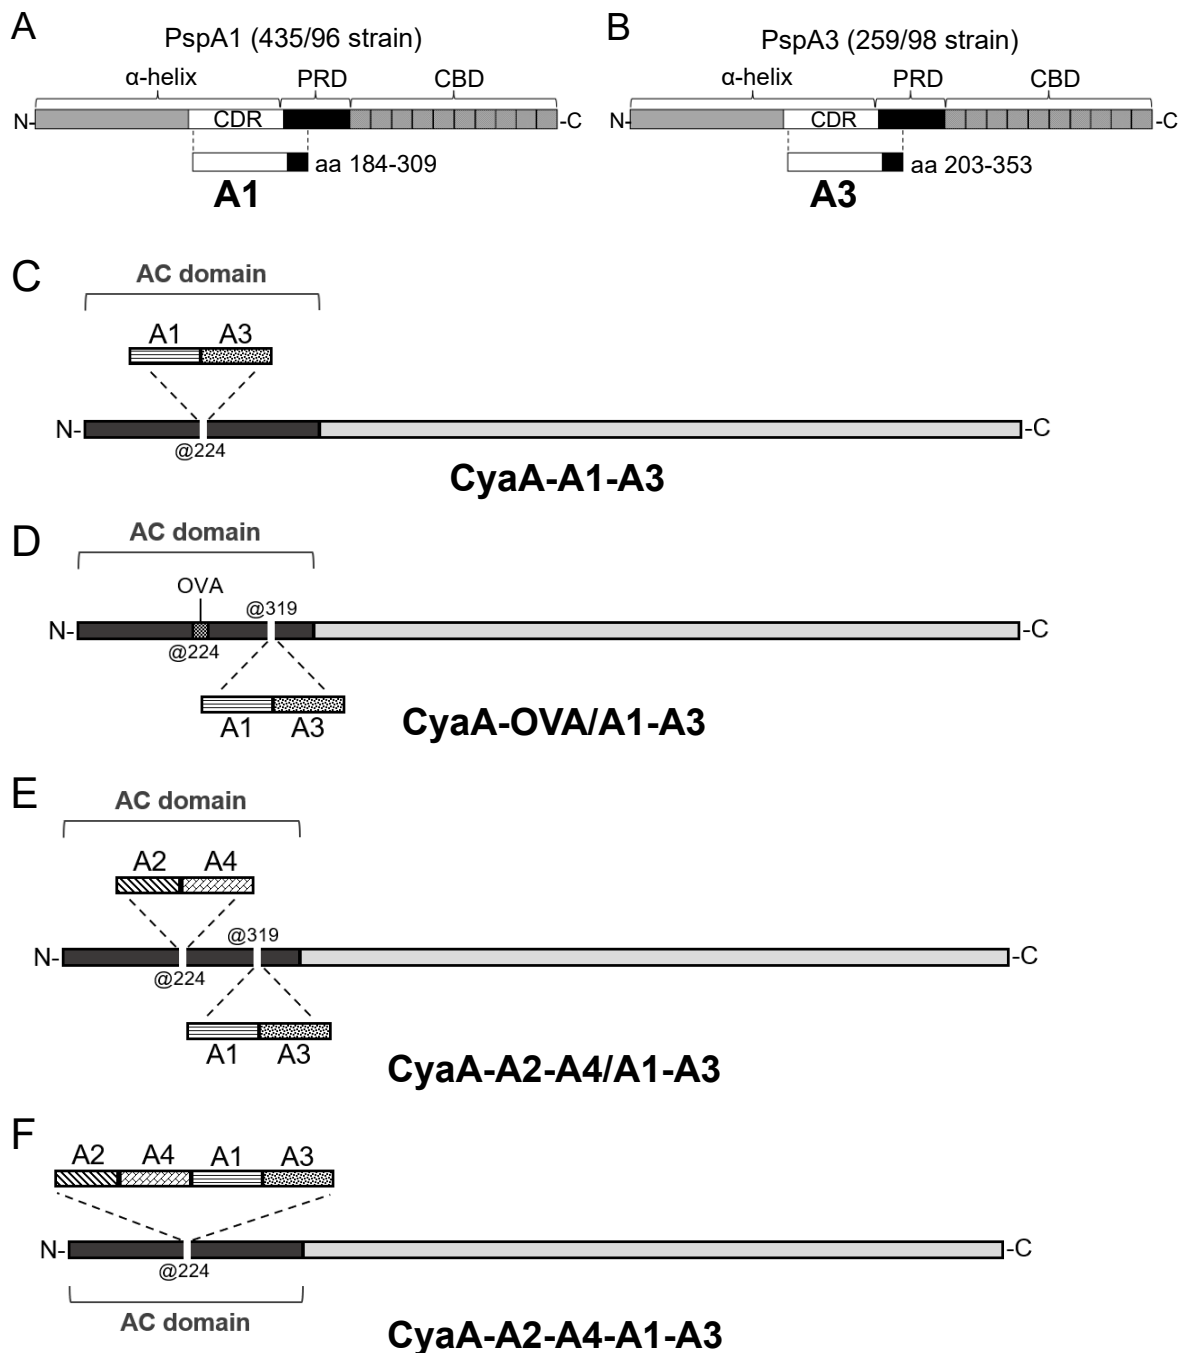

**Supplementary Fig. 3. Construction of new CyaA-PspA antigens.**

Schematic representation of (A) PspA1 and (B) PspA3 and their respective fragments, A1 and A3, comprising the clade definition region (CDR) and the beginning of the proline-rich domain (PRD) of each protein. CBD = choline binding domain. (C) The A1-A3 fusion was inserted between amino acids 224 and 225 of the AC domain of CyaA to generate CyaA-A1-A3. (D) The A1-A3 fusion was inserted between amino acids 319 and 320 of the AC domain of CyaA-OVA21, which contains the OVA peptide between amino acids 224 and 225, thus generating CyaA-OVA/A1-A3. (E) The A2-A4 fusion was grafted between amino acids 224 and 225, while the A1-A3 fusion was inserted between amino acids 319 and 320 of the AC domain, producing CyaA-A2-A4/A1-A3. (F) The A2-A4-A1-A3 fusion was grafted between amino acids 224 and 225 of the AC domain to generate CyaA-A2-A4-A1-A3.

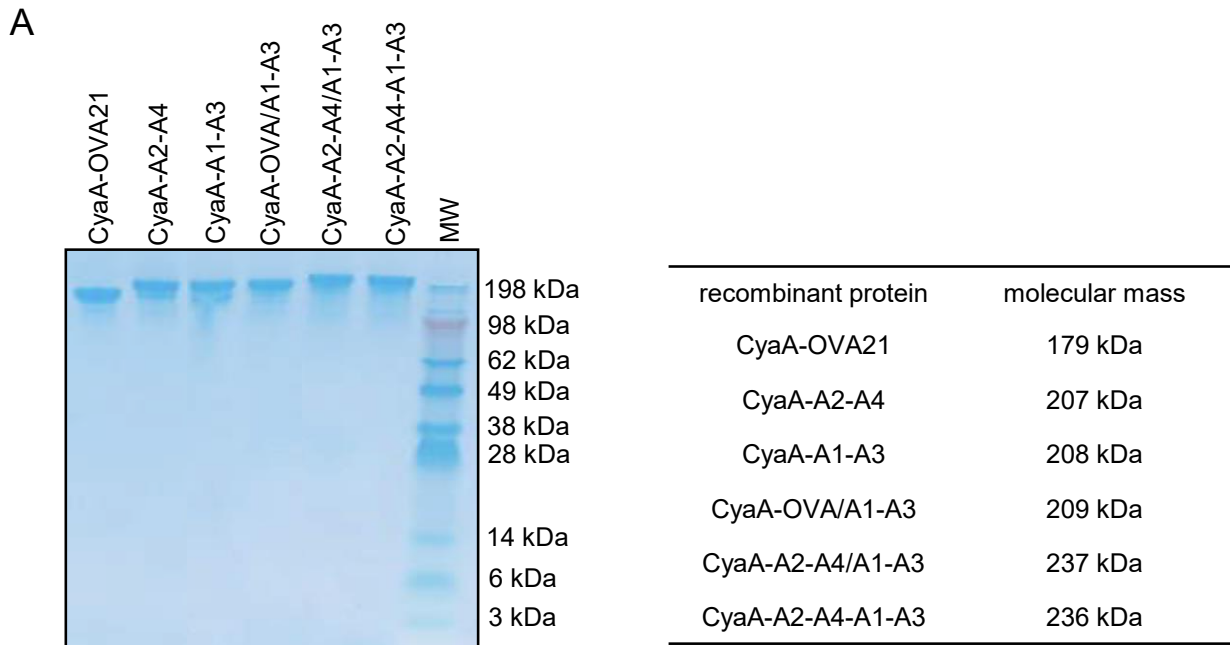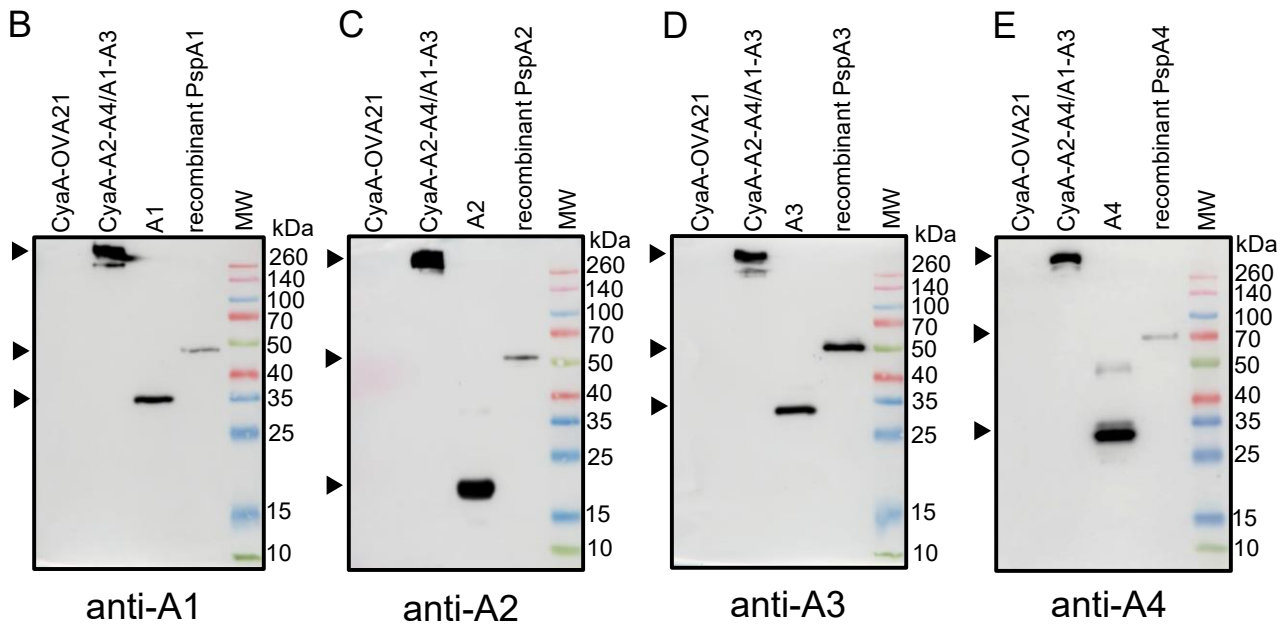

**Supplementary Fig. 4. Purified CyaA-PspA recombinant proteins.**

(A) Purified recombinant proteins were analyzed by SDS-PAGE using 8% polyacrylamide gel and Coomassie Blue staining. MW = SeeBlue Plus2 Pre-Stained Protein Standard, (Thermo Fischer Scientific, USA). The predicted molecular mass for each recombinant protein is indicated on the right side. CyaA-A2-A4/A1-A3 was analyzed by western blot using (B) anti-A1, (C) anti-A2, (D) anti-A3 and (E) anti-A4 polyclonal sera. The respective A fragments and recombinant proteins comprising the N-terminal region of PspAs from clades 1 to 4 were used as positive controls. CyaA-OVA21 was used as negative control. Arrows point bands of interest. MW: Spectra Multicolor Broad Range Protein Ladder Full range (Thermo Fischer Scientific, USA).

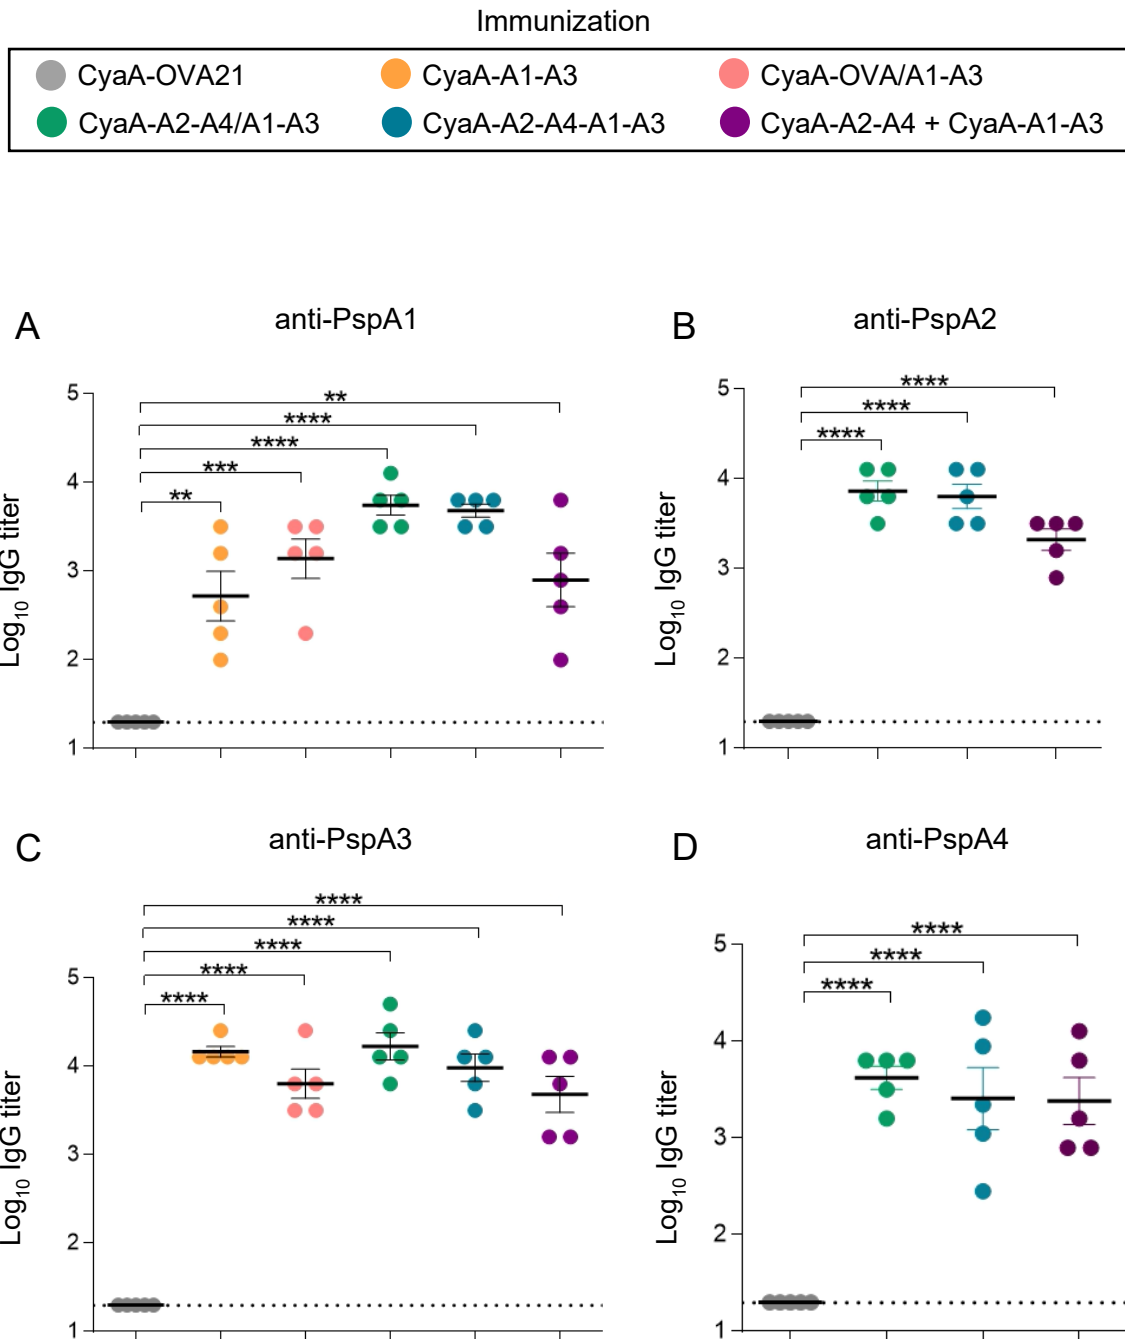

**Supplementary Fig. 5. Immunogenicity of the new CyaA-PspA antigens.**

Mice were immunized with three s.c. doses of the new CyaA-PspA antigens or with a combination of CyaA-A1-A3 with the CyaA-A2-A4 antigen; control group received CyaA-OVA21 (n = 5 animals per group). Sera collected two weeks after the third dose were analyzed by ELISA for the levels of specific IgG against the N-terminal region of (A) PspA1, (B) PspA2, (C) PspA3 or (D) PspA4. Circles represent individual data; lines represent the mean for each group  $\pm$  SEM and dashed lines indicate the limit of detection. Statistical analyses were performed by One-way ANOVA with Tukey's post-test: \*\*P<0.01; \*\*\*P<0.001; \*\*\*\*P<0.0001.

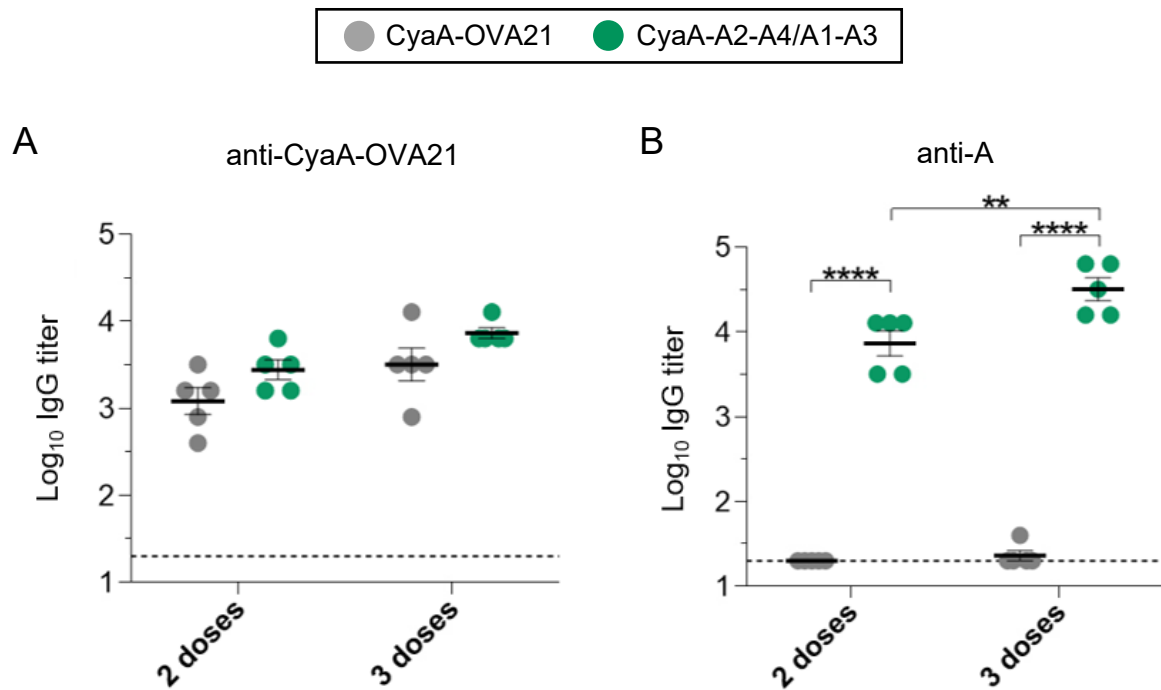

**Supplementary Fig. 6. Immunization with CyaA-A2-A4/A1-A3 induces IgG antibodies against CyaA-OVA21 and A fragments.**

Mice (n = 5 per group) were immunized with three s.c. doses of CyaA-OVA21 or CyaA-A2-A4/A1-A3. Sera collected 2 weeks after the second and the third dose were analyzed by ELISA for the levels of specific IgG against **(A)** CyaA-OVA21 or **(B)** a mixture of the A fragments (A1, A2, A3 and A4). Results were analyzed by Two-way ANOVA with Tukey's post-test: \*\*P<0,01 and \*\*\*\*P<0.0001. Circles represent individual data; lines represent the mean for each group ± SEM and dashed lines indicate the limit of detection.

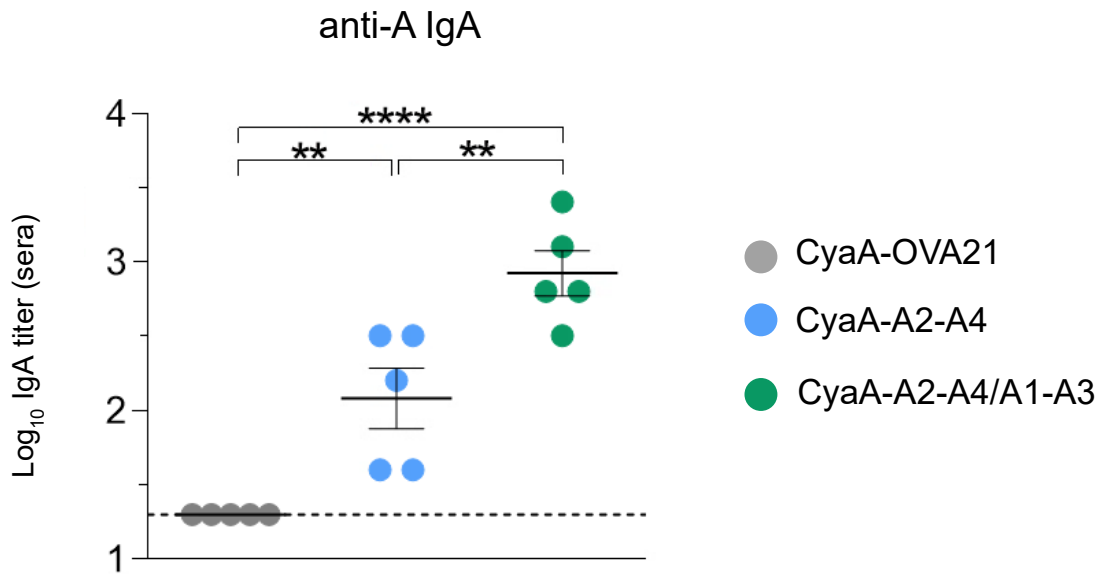

**Supplementary Fig. 7. Immunization with CyaA-A2-A4/A1-A3 induces high levels of circulating anti-PspA IgA.**

Mice (n = 5 per group) were immunized with three s.c. doses of CyaA-OVA21, CyaA-A2-A4 or CyaA-A2-A4/A1-A3. Sera collected 2 weeks after the third dose were analyzed by ELISA for the levels of specific IgA against a mixture of the A fragments (A1, A2, A3 and A4). Results were analyzed by One-way ANOVA with Tukey's post-test: \*\*P<0,01 and \*\*\*\*P<0.0001. Circles represent individual data; lines represent the mean for each group ± SEM; dashed line indicates the limit of detection.

## Antibody binding to pneumococcal surface

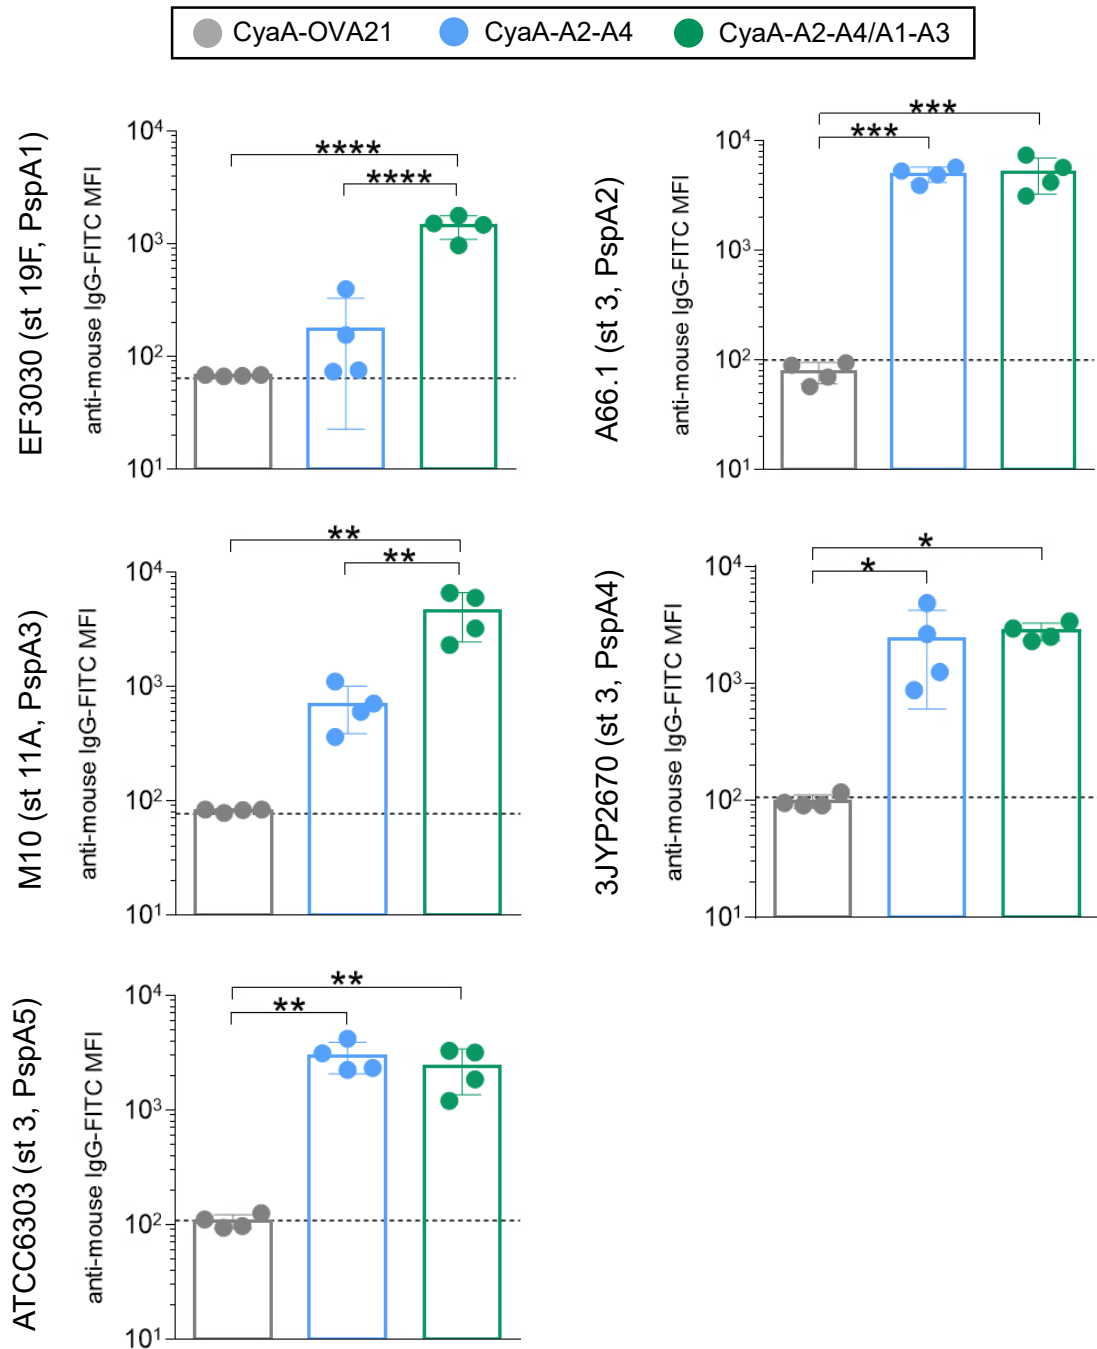

### Supplementary Fig. 8. Sera from CyaA-A2-A4/A1-A3 immunized mice present high levels of reactivity with different pneumococcal strains.

Mice were immunized with three s.c. doses of CyaA-OVA21, CyaA-A2-A4 or CyaA-A2-A4/A1-A3. Sera collected after the third dose (n=4 per group) were incubated with the indicated pneumococcal strains. Antibody binding was detected by incubation with anti-mouse IgG-FITC. Samples were analyzed by flow cytometry, with 15,000 events recorded. Results were analyzed using the FlowJo V10 software. Statistical analyses were performed by One-way ANOVA with Tukey's post-test: \*P<0,05; \*\*P<0,01; \*\*\*P<0,001 and \*\*\*\*P<0.0001. Circles indicate the median fluorescence intensity (MFI) for each histogram of FITC-fluorescence, bars represent the mean for each group  $\pm$  SEM, and the dashed lines indicate the MFI produced by negative control bacteria, incubated with anti-mouse IgG-FITC, without previous incubation with immune sera. Serotype (st) and PspA clade of each strain are indicated.

## C3 deposition onto pneumococcal surface

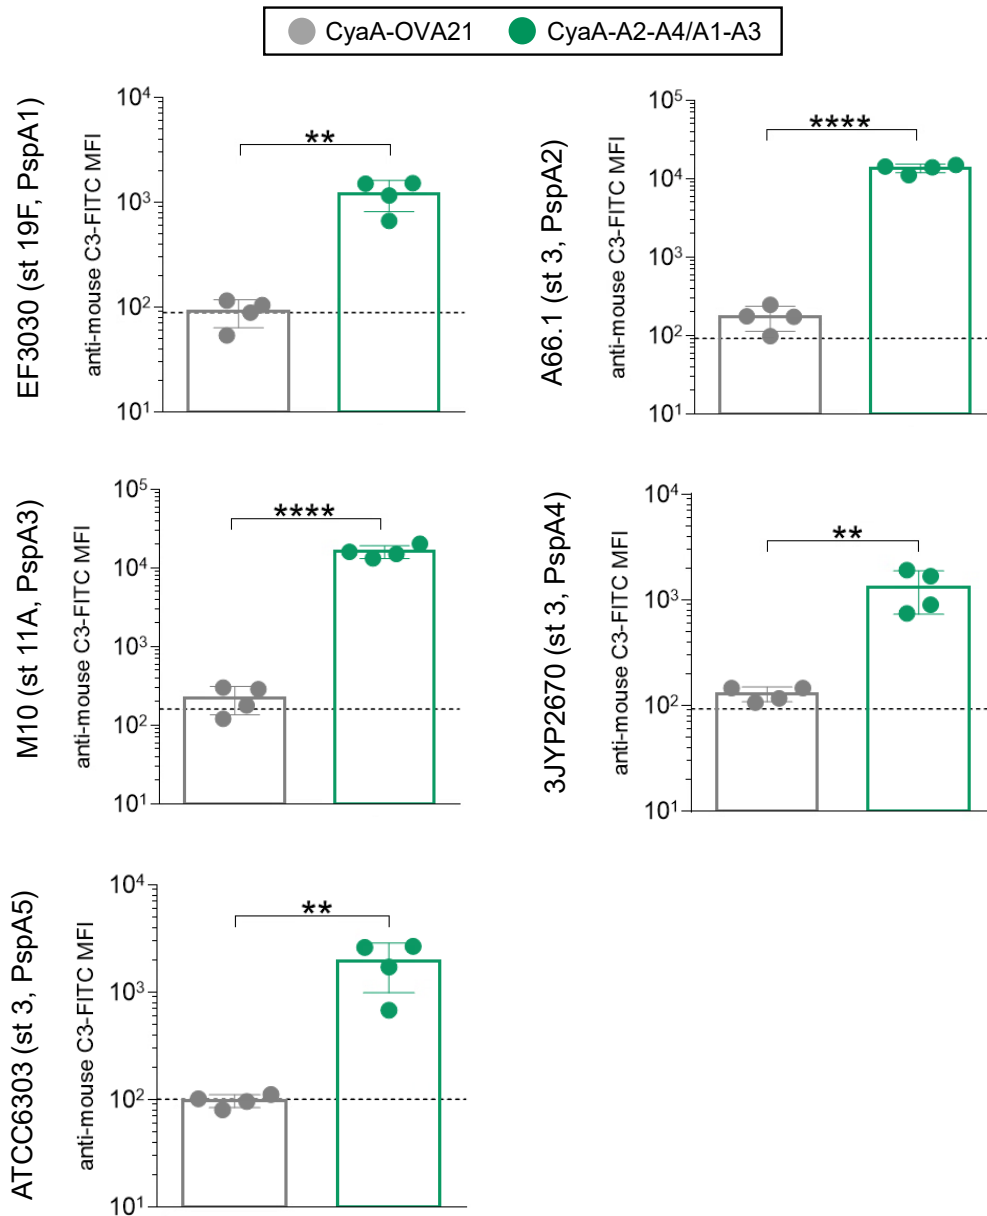

### Supplementary Fig. 9. Complement deposition onto pneumococcal surface after incubation with sera from CyaA-A2-A4/A1-A3 immunized mice.

Mice were immunized with three s.c. doses of CyaA-OVA21, CyaA-A2-A4 or CyaA-A2-A4/A1-A3. Sera collected after the third dose (n=4 per group) were heat-inactivated and incubated with the indicated pneumococcal strains. Bacteria were then incubated with complement source (naive mice sera), followed by FITC-conjugated anti-mouse C3-FITC. Samples were analyzed by flow cytometry with 15,000 events recorded. Results were analyzed using the FlowJo V10 software. Statistical analyses were performed by One-way ANOVA with Tukey's post-test: \*P<0,05; \*\*P<0,01; \*\*\*P<0,001 and \*\*\*\*P<0.0001. Circles indicate the median fluoresce intensity (MFI) for each histogram of FITC-fluorescence, bars represent the mean for each group  $\pm$  SEM, and the dashed lines indicate the MFI produced by negative control bacteria, incubated with complement source and anti-mouse C3-FITC, without previous incubation with immune sera. Serotype (st) and PspA clade of each strain are indicated.

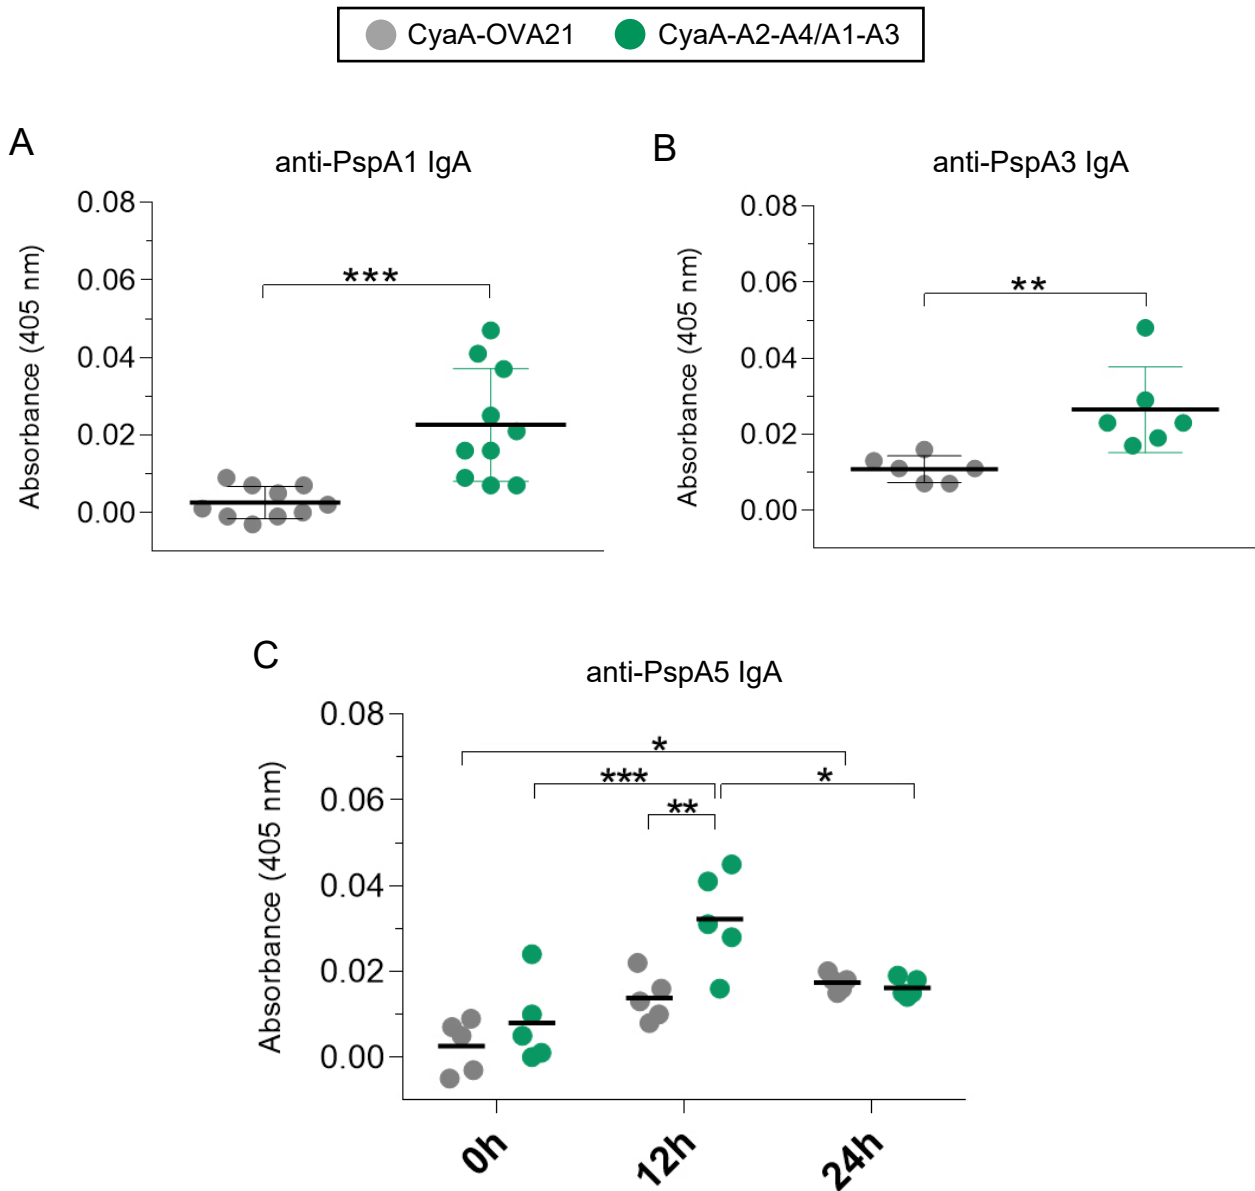

**Supplementary Fig. 10. Immunization with CyaA-A2-A4/A1-A3 minimal levels of anti-PspA IgA in the LRT of mice.**

Mice were immunized with three s.c. doses of CyaA-OVA21 or CyaA-A2-A4/A1-A3. Three weeks after the third dose, animals were intranasally challenged with pneumococcal strains (A) EF3030 (serotype 19F, PspA1), (B) TIGR4 (serotype 4, PspA3), or (C) ATCC6303 (serotype 3, PspA5). BALF samples were collected at (A-C) 24 h or (c) at 12 h post-challenge; BALF from (C) non-infected mice (0 h) were also collected. Samples were analyzed by ELISA for (A) anti-PspA1, (B) anti-PspA3, or (C) anti-PspA5 IgA, and the absorbance values at 1:2 dilution are shown. (A, B) Student's T test or (C) Two-way ANOVA with Tukey's post-test was used to analyze results: \*P<0.05; \*\*P<0.01; \*\*\*P<0.001. Circles represent individual data; lines represent the mean for each group  $\pm$  SEM.

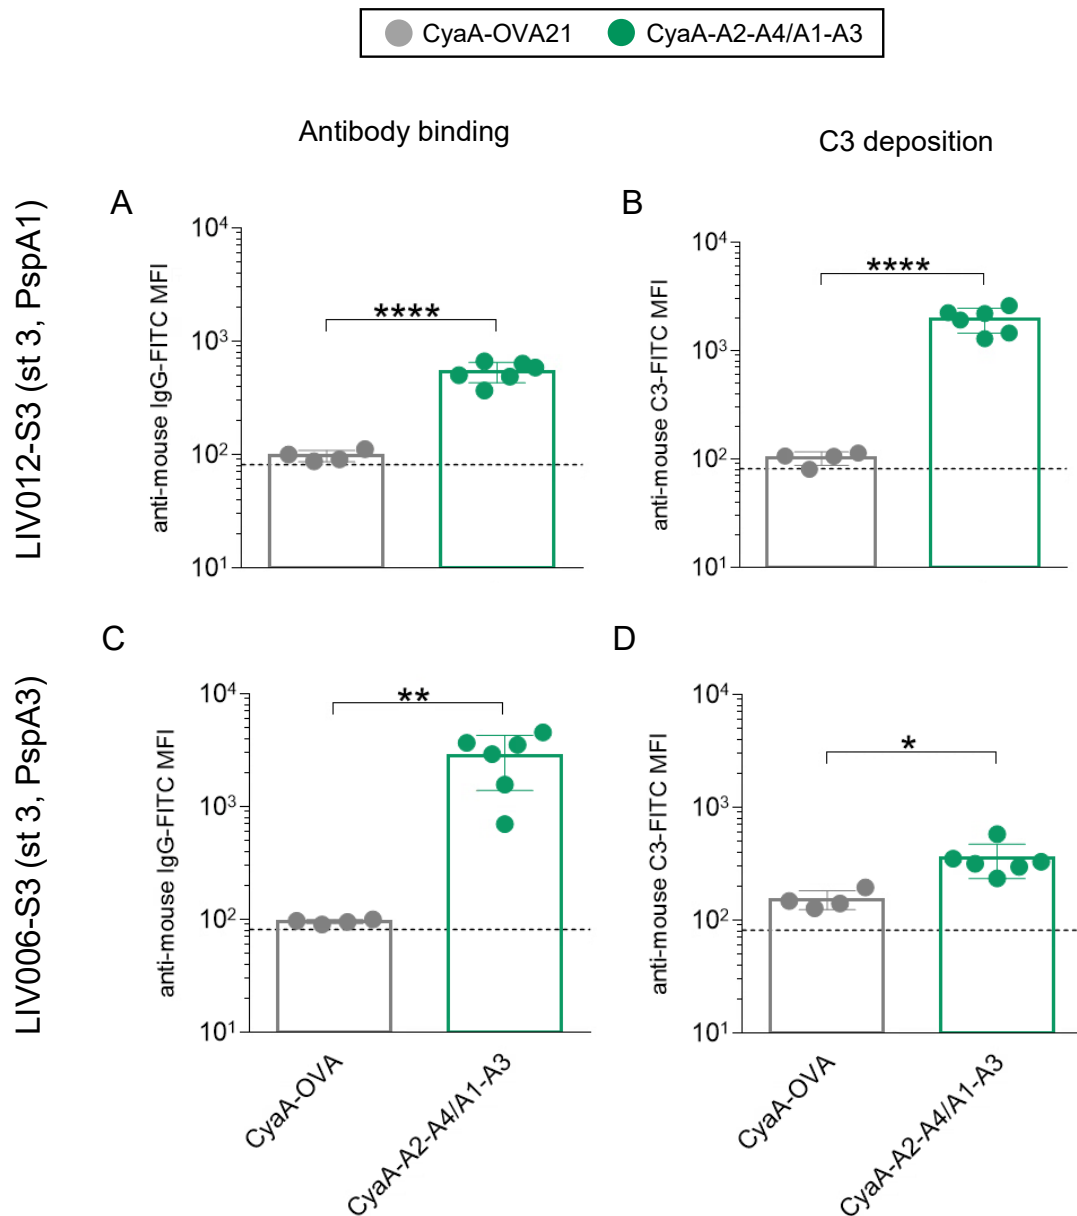

**Supplementary Fig. 11. Sera from CyaA-A2-A4/A1-A3 immunized mice induce significant levels of antibody binding and complement deposition onto the surface of serotype 3 strains circulating in the post-PCV period.**

Mice were immunized with three s.c. doses of CyaA-OVA21, CyaA-A2-A4 or CyaA-A2-A4/A1-A3. Sera collected after the third dose ( $n=4$  or  $6$  mice per group) were heat-inactivated and incubated with the pneumococcal strains (**A, B**) LIV012-S3 or (**C, D**) LIV006-S3. (**A, C**) Antibody binding was detected by incubation with anti-mouse IgG-FITC. (**B, D**) Bacteria pre-incubated with immune sera were then incubated with complement source (naive mice sera), followed by FITC-conjugated anti-mouse C3-FITC. All samples were analyzed by flow cytometry, with 15,000 events recorded. Results were analyzed using the FlowJo V10 software. Statistical analyses were performed by One-way ANOVA with Tukey's post-test:  $*P<0,05$ ;  $**P<0,01$ ; and  $****P<0.0001$ . Circles indicate the median fluorescence intensity (MFI) for each histogram of FITC-fluorescence, bars represent the mean for each group  $\pm$  SEM. The dashed lines indicate the MFI produced by negative control bacteria, (**A, C**) incubated with anti-mouse IgG-FITC or (**B, D**) complement source and anti-mouse C3-FITC, in both cases without previous incubation with immune sera. Serotype (st) and PspA clade of each strain are indicate

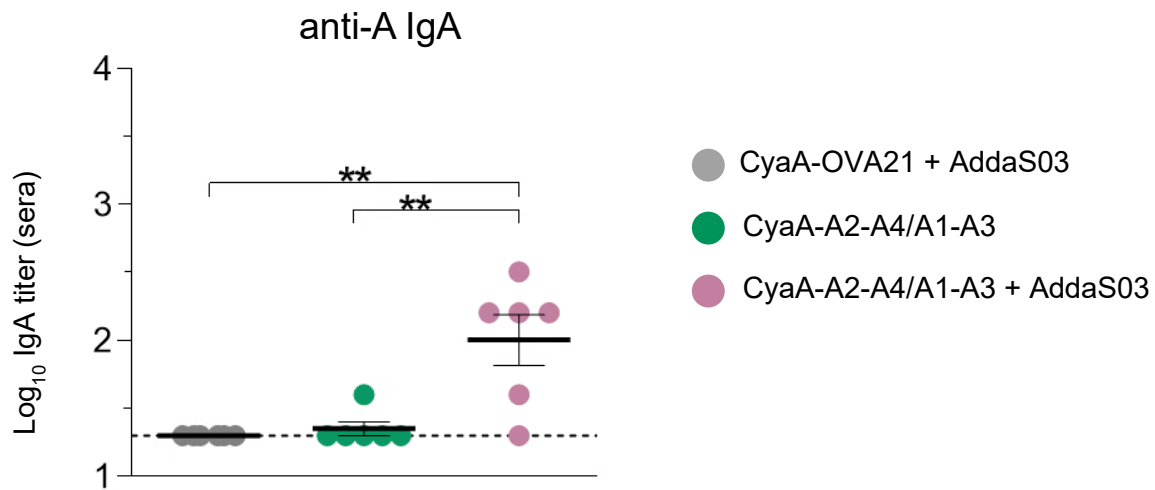

**Supplementary Fig. 12. Immunization with CyaA-A2-A4/A1-A3 induces circulating anti-PspA IgA.**

Mice (n = 6 per group) were immunized with one s.c. dose of CyaA-OVA21, CyaA-A2-A4/A1-A3 or CyaA-A2-A4/A1-A3 + AddaS03. Sera collected 2 weeks after immunization were analyzed by ELISA for the levels of specific IgA against a mixture of the A fragments (A1, A2, A3 and A4). Results were analyzed by One-way ANOVA with Tukey's post-test: \*\*P<0,01. Circles represent individual data; lines represent the mean for each group ± SEM and the dashed line indicates the limit of detection.

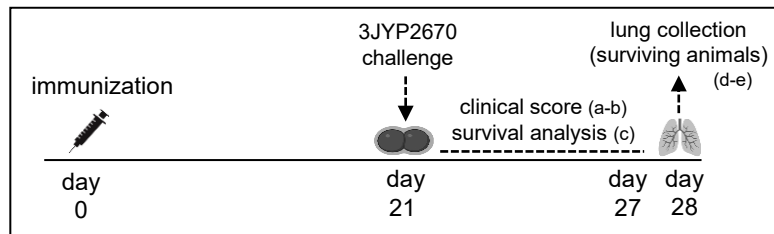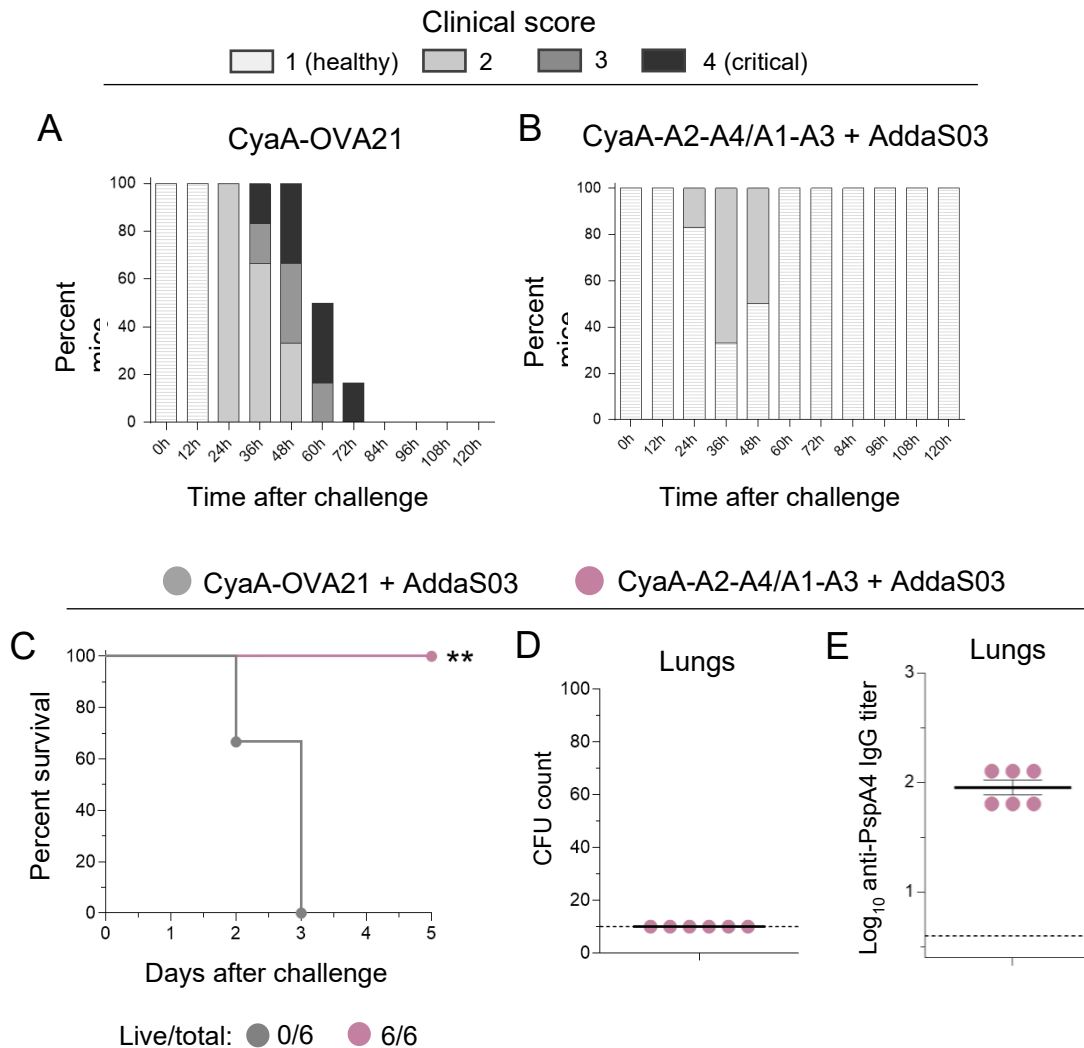

**Supplementary Fig. 13. Mice immunized with CyaA-A2-A4/A1-A3 + AddaS03 presented no critical symptoms of disease and no detectable levels of bacteria in the lungs after challenge with 3JYP2670.**

Mice were immunized subcutaneously with one dose of CyaA-A2-A4/A1-A3 + AddaS03 and the control group received CyaA-OVA21 (n = 6 per group); schematic representation of immunization protocol is shown at the top of the figure. Three weeks after immunization, animals were challenged with pneumococcal strain 3JYP2670 (serotype 3, PspA4). **(A, B)** Animals were analyzed for symptoms of disease twice a day for 5 days, being scored from 1 (healthy) to 4 (critical, humane endpoint). **(C)** Survival was analyzed using the Log-Rank survival curve with Mantel-Cox post-test: \*\*P<0.001 (comparison with CyaA-OVA21). At the 5<sup>th</sup> day after challenge, lungs from surviving animals were collected and macerates were **(D)** plated on blood agar for CFU counting and **(e)** analyzed by ELISA for anti-PspA4 IgG titers. Circles represent individual data; lines represent the mean for each group ± SEM and dashed lines indicate the limit of detection.

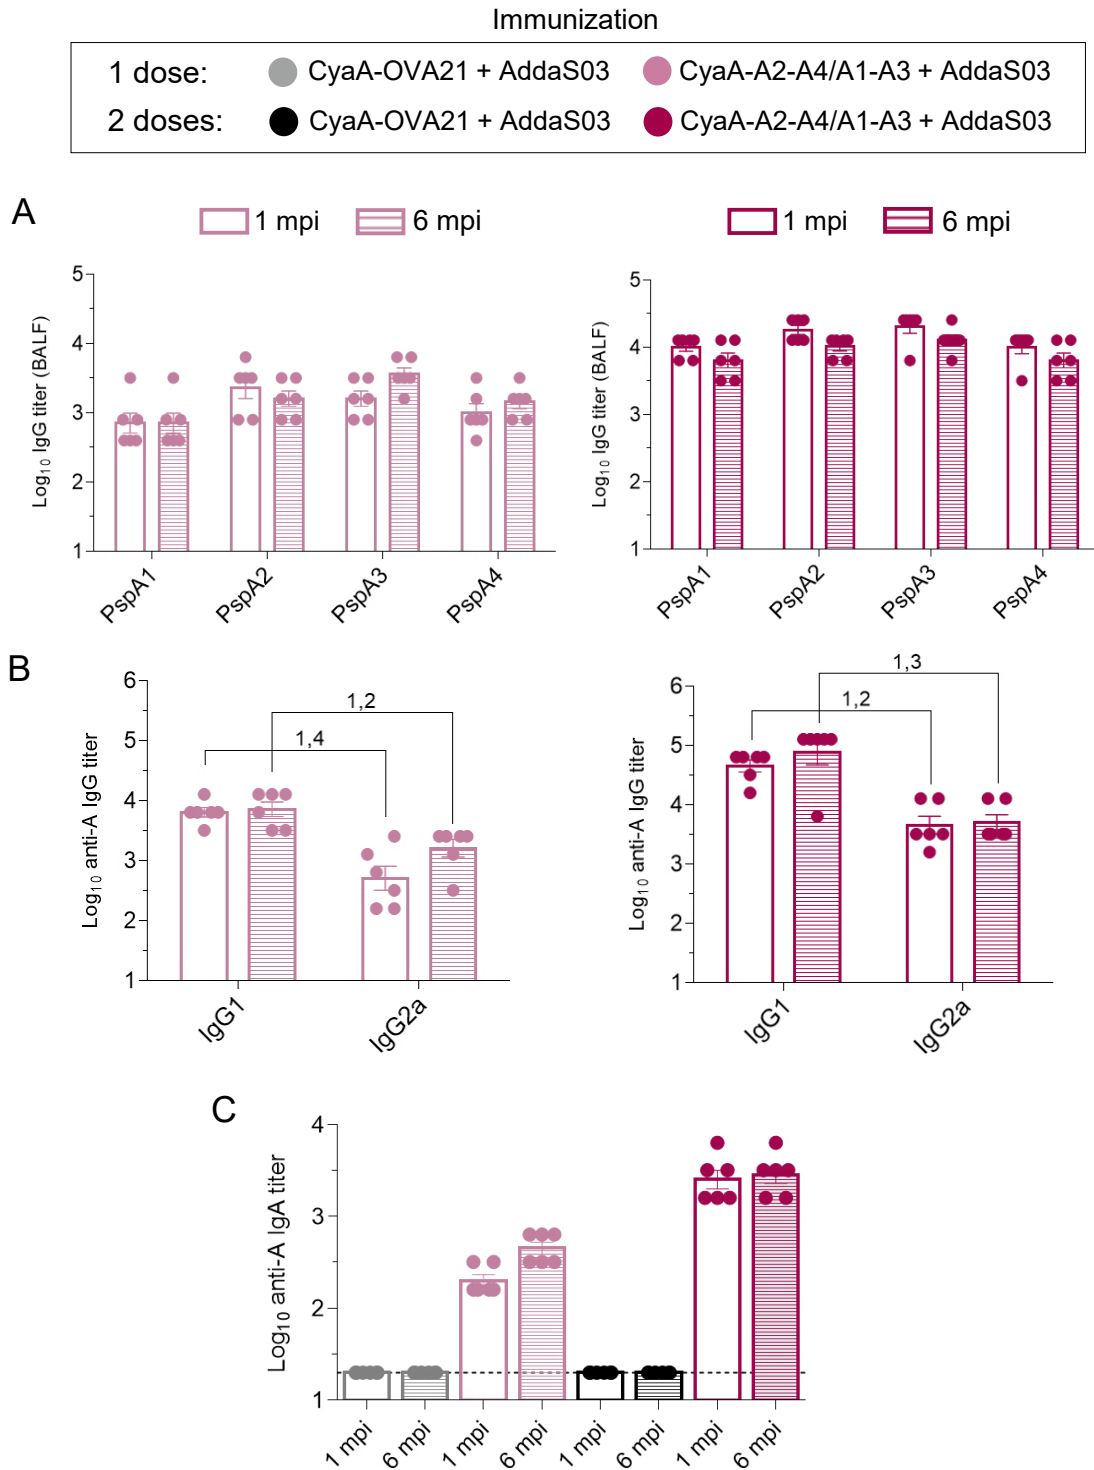

**Supplementary Fig. 14. Sera collected at 1 or 6 months post immunization with CyaA-A2-A4/A1-A3 + AddaS03 present similar antibody levels.**

Mice were immunized with one or two doses of CyaA-A2-A4/A1-A3 + AddaS03 (n = 6 per group). Sera collected at 1 or 6 months post immunization (mpi) were analyzed by ELISA for **(A)** the levels of specific IgG against the N-terminal region of PspAs from clades 1 to 4, **(B)** IgG1 and IgG2a or **(C)** IgA against a mixture of the A fragments (A1, A2, A3 and A4). **(B)** The IgG1/IgG2a ratios are indicated in the graph. Circles represent individual data, lines represent the mean for each group  $\pm$  SEM and dashed lines indicate the limit of detection. For each group, results obtained for sera collected at 1 or 6 mpi were analyzed by Student's T test.

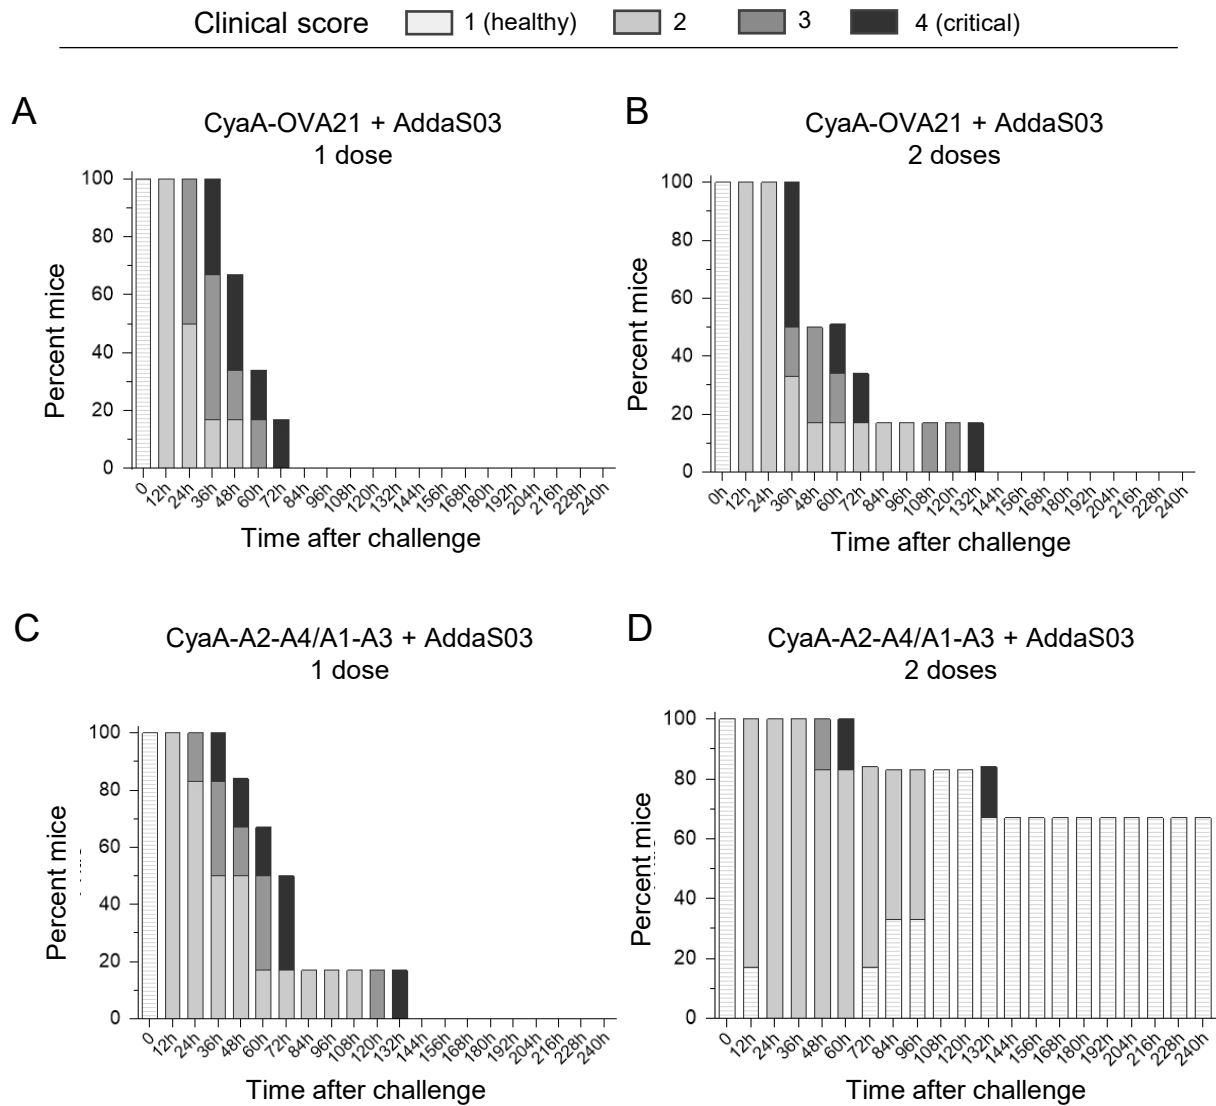

**Supplementary Fig. 15. Clinical score of mice challenged with 3JYP2670 at 6 months post-immunization with CyaA-A2-A4/A1-A3 + AddaS03.**

Mice were immunized subcutaneously with (A) one or (B) two doses of CyaA-OVA21 + AddaS03, or (C) one or (D) two doses of CyaA-A2-A4/A1-A3 + AddaS03 (n = 6 per group). Six months after immunization, animals were challenged with pneumococcal strain 3JYP2670 (serotype 3, PspA4) and analyzed for symptoms of disease twice a day for 10 days, being score from 1 (healthy) to 4 (critical, humane endpoint).

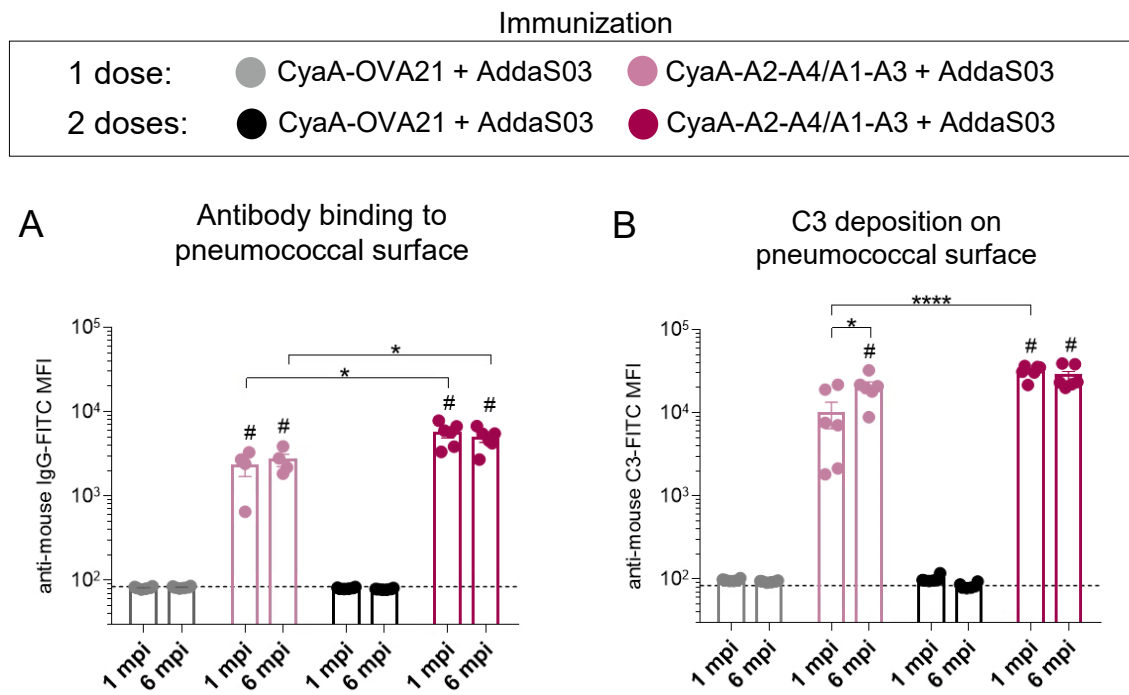

**Supplementary Fig. 16. Sera collected at 1 or 6 months post immunization with CyaA-A2-A4/A1-A3 + AddaS03 present similar levels of antibody binding and complement deposition onto the surface of pneumococcal strain 3JYP2670.**

Mice were immunized with one or two doses of CyaA-A2-A4/A1-A3 + AddaS03. Sera collected at 1 or 6 months post immunization (mpi) (n= 4 or 6 mice per group) were heat-inactivated and incubated with the pneumococcal strain 3JYP2670. **(A)** Antibody binding was detected by incubation with anti-mouse IgG-FITC. **(B)** Bacteria pre-incubated with immune sera were then incubated with complement source (naive mice sera), followed by FITC-conjugated anti-mouse C3-FITC. All samples were analyzed by flow cytometry, with 15,000 events recorded. Results were analyzed using the FlowJo V10 software. Statistical analyses were performed by Two-way ANOVA with Tukey's post-test: \*P<0,05 and \*\*\*P<0.001 (comparison between the groups indicated by the bars); #P<0.0001, in comparison to CyaA-OVA21 + AddaS03 immunized groups, regardless of the number of doses and time of collection of sera. Circles indicate the median fluoresce intensity (MFI) for each histogram of FITC-fluorescence, bars represent the mean for each group  $\pm$  SEM, and dashed lines indicate the MFI produced by negative control bacteria, incubated with anti-mouse IgG-FITC **(A)** or complement source and anti-mouse C3-FITC **(B)**, without previous incubation with immune sera.

## Supplementary Tables

**Supplementary Table 1.** Primers used for amplification of A1 and A3 from pAE-*pspA1*<sup>1</sup> and pAE-*pspA3*<sup>2</sup>, respectively.

| Primer     | 5' – 3' sequence                                     |
|------------|------------------------------------------------------|
| A1 forward | <u>GGATCC</u> CTCAAAGAGATTGATGAGTCTGATTCAGAAG        |
| A1 reverse | <b>AAGCTT</b> TCAAGGAGCCGGGCGTGGTTTTGGTTGTTTCAGCTGG  |
| A3 forward | <u>GGATCC</u> GATGGCACAGAAGTTATAGAAGCTAAATTAAC       |
| A3 reverse | <b>AAGCTT</b> CATGGTGCAGGAGCTGGTTGCTCTGGTTTTGGTGCAGG |

BamH I restriction site underlined; Hind III restriction site in bold.

**Supplementary Table 2:** Synthetic DNAs used for cloning of A1 and A3 into pCACT plasmids.

|     |                                                                                                                                                                                                                                                                                                                                                                                                                                                                                                                                                                                                                                                     |
|-----|-----------------------------------------------------------------------------------------------------------------------------------------------------------------------------------------------------------------------------------------------------------------------------------------------------------------------------------------------------------------------------------------------------------------------------------------------------------------------------------------------------------------------------------------------------------------------------------------------------------------------------------------------------|
| I   | CCGAAACCGGCACCGGCTCCGGGT <u>ACTAGT</u> GACGGTACTGAAGTGATTGAGGCCAAAGCTTAATAA<br>GGGCGAGGCTGAGCTTAATGCAAAGCAAGCCGAGTTGGCTAAGAAGCAAACAGAGCTCGAGAAGT<br>TATTGGATAGCCTCGATCCCGAGGGAAAGACGCAAGATGAGTTGGATAAGGAAGCAGAGGAAGCC<br>GAGTTGGATAAGAAGGCCGATGAGTTACAAAATAAGGTCGCAGATCTTGAGAAGGAGATTTCAAAT<br>CTCGAGATTTTGCTCGGCGGAGCAGATAGCGAGGATGATACCGCAGCTCTGCAAATAAGTTGGCC<br>ACAAAGAAGGCAGAGTTAGAGAAGACTCAAAGGAGCTTGATGCAGCTTTGAATGAGTTGGGCCA<br>GATGGGGATGAGGAAGAGACGCCTGCTCCTGCCCTCAACCAGAGCAACCAGCACCCAGCACCAAA<br>ACCAGAACAACCTGCCCCAGCACCG <b>GGTACC</b> GCCCGCCAGCGAGGCCACGGG (Bcu I restriction site<br>underlined; Acc65 I restriction site in bold) |
| II  | CCGAAACCGGCACCGGCTCCGACCAGTGACGGTACTGAAGTTATAGAGGCTAAGCTCAATAAGGG<br>AGAGGCAGAGCTCAATGCCAAGCAAGCAGAGCTTGCTAAGAAGCAAACAGAGCTTGAGAAGCTCCT<br>CGATAGCTTAGATCCTGAGGGCAAGACGCAAGATGAGCTTGATAAAGAGGGCCGAAGAGGCTGAGT<br>TAGATAAGAAGGCCGATGAGTTACAAAATAAGGTGGCCGATTTAGAGAAGGAGATTTCCAATCTTGA<br>GATTCTCTTAGGTGGCGCCGATAGCGAGGATGATACGGCTGCCTTACAAAATAAGCTCGCTACTAA<br>GAAGGCTGAGTTAGAGAAGACACAAAAGGAGTTAGATGCAGCCCTCAATGAGTTGGGACCCGATG<br>GGATGAAGAAGAGACTCCAGCACCCGCTCCTCAACCAGAGCAACCCGCACCCGCACCAAAGCCC<br>GAGCAACCTGCTCCGGCACCG <b>ACTAGT</b> GAAAGCCAGATGCTCACGCGC (Bcu I restriction site in<br>bold)                                                |
| III | CTGGCGCGTACGCGTAGGCCTGCTAGCCTGAAAGAAATCGACGAATCTGACTCTGAAGACTACGTT<br>AAAGAAGGTCTGCGTGCGCCGCTGCAGTTCGAGCTGGACGTTAAACAGGGCAAACCTGTCTAAACTG<br>GAAGAAGTGTCTGACAAAATCGACGAACCTGGACGCGGAAATCGCGAAACTGGAAAAAGACGTTGAA<br>GACTTCAAAAACCTCTGACGGTGAACAGGCGGGTACGTACCTGGCGGCGGCGGAAGAAGACCTGGT<br>TGCGAAAAAAGCGGAACTGGAAAAAACC GAAGCGGACCTTAAGAAAGCGGTTAACGAACCGGAAAA<br>ACCGGCGGAAGAAACCCCGGCGCCGGCGCCGAAACCGGAACAGCCGGCGGAACAGCCGAAACC<br>GGCACCGGCTCCG <b>GGTACC</b> GCCCGCCAGCGAGGCCACGGG (Nhe I restriction site underlined; Kpn I<br>restriction site in bold)                                                                                        |
| IV  | AAGATTTTCGTCGTATCGGCC <u>ACCGGT</u> CTGAAAGAAATCGACGAATCTGACTCTGAAGACTACGTTA<br>AAGAAGGTCTGCGTGCGCCGCTGCAGTTCGAGCTGGACGTTAAACAGGGCAAACCTGTCTAAACTG<br>GAAGAAGTGTCTGACAAAATCGACGAACCTGGACGCGGAAATCGCGAAACTGGAAAAAGACGTTGAA<br>GACTTCAAAAACCTCTGACGGTGAACAGGCGGGTACGTACCTGGCGGCGGCGGAAGAAGACCTGGT<br>TGCGAAAAAAGCGGAACTGGAAAAAACC GAAGCGGACCTTAAGAAAGCGGTTAACGAACCGGAAAA<br>ACCGGCGGAAGAAACCCCGGCGCCGGCGCCGAAACCGGAACAGCCGGCGGAACAGCCGAAACC<br>GGCACCGGCTCCG <b>ACTAGT</b> GAAAGCCAGATGCTCACGCG (BshT I restriction site underlined; Bcu I<br>restriction site in bold).                                                                              |

## Supplementary References

1. Moreno, A.T. *et al.* Immunization of mice with single PspA fragments induces antibodies capable of mediating complement deposition on different pneumococcal strains and cross-protection. *Clinical and vaccine immunology : CVI* **17**, 439-446 (2010).
2. Darrieux, M. *et al.* Recognition of pneumococcal isolates by antisera raised against PspA fragments from different clades. *J Med Microbiol* **57**, 273-278 (2008).
